1 **Endoglin deficiency elicits hypoxia-driven congestive heart failure in zebrafish.**

2

3 Etienne Lelièvre<sup>1§</sup>, Charlotte Bureau<sup>1</sup>, Yann Bordat<sup>1</sup>, Maxence Frétaud<sup>3</sup>, Christelle Langevin<sup>4</sup>, Chris  
4 Jopling<sup>2</sup> and Karima Kissa<sup>1§</sup>.

5

6 Authors' affiliations

7 1 LPHI, INSERM, CNRS, Univ. Montpellier, France.

8 2 Institut de Génomique Fonctionnelle, Université de Montpellier, CNRS, INSERM LabEx ICST,  
9 Montpellier, France.

10 3 Université Paris-Saclay INRAE, UVSQ, VIM, 78350 Jouy-en-Josas, France.

11 4 INRAE, IERP, Université Paris-Saclay, 78350 Jouy-en-Josas, France.

12

13 § Author for correspondence.

14

15 Correspondence

16 Etienne Lelièvre, PhD

17 UMR5235, Université de Montpellier

18 Place Eugène Bataillon, Bât. 24, cc107

19 34 095 Montpellier cedex 5, France

20 etienne.lelievre@umontpellier.fr or etienne.lelievre@inserm.fr

21 Phone: +33 467 14 92 04

22 ORCID ID 0000-0003-0452-1578

23

24 or

25

26 Karima Kissa, PhD

27 UMR5235, Université de Montpellier

28 Place Eugène Bataillon, Bât. 24, cc107

29 34 095 Montpellier cedex 5, France

30 karima.kissa@umontpellier.fr

31 Phone: +33 467 14 92 03

32 ORCID ID 0000-0002-7683-3661

33

34

35 **Key words: Endoglin, HHT, Heart Failure, Cardiomegaly, Hypoxia, Endothelial cells**

36 **Summary Statement.**

37 Endoglin deficiency in zebrafish recapitulates critical aspects of Hereditary Hemorrhagic Telangiectasia

38 (HHT) and will thus constitute a valuable model in large scale screens for HHT-active drugs.

39 **Abstract**

40 Hereditary hemorrhagic Telangiectasia (HHT) is a rare genetic disease relying on mutations affecting  
41 components of Bone Morphogenetic Protein and Transforming Growth Factor- $\beta$  (BMP/TGF- $\beta$ )  
42 signaling pathway in endothelial cells. This disorder is characterized by arterio-venous malformations  
43 prone to rupture, and ensuing hemorrhages are responsible for iron deficiency anemia. Along with  
44 Activin receptor-like kinase ALK1, Endoglin is involved in the vast majority of HHT cases. In this report,  
45 we characterized zebrafish endoglin locus and demonstrated that it produces two phylogenetically  
46 conserved protein isoforms using a distinctive alternative splicing mechanism. Functional analysis of a  
47 Crispr/Cas9 zebrafish Endoglin mutant revealed that Endoglin deficiency results in massive death  
48 during the course from juvenile stage to adulthood. Endoglin deficient fish develop a cardiomegaly  
49 resulting in heart failure and hypochromic anemia which both stem from chronic hypoxia. Histological  
50 analysis and confocal imaging evidenced structural alterations of the developing gill and its underlying  
51 vascular network that tally with hypoxia. Finally, phenylhydrazine treatment demonstrated that  
52 lowering hematocrit/blood viscosity alleviates heart failure and enhances survival of Endoglin deficient  
53 fish. Altogether, our data indicate that Endoglin is crucial for gill vascular development and that further  
54 studies using zebrafish in general and this endoglin mutant in particular will provide crucial hints  
55 regarding the molecular and cellular events altered in HHT for the development of new therapeutic  
56 strategies.

## 57 **Introduction**

58 Endoglin (CD105) belongs to the Bone Morphogenetic Protein and Transforming Growth  
59 Factor- $\beta$  (BMP/TGF- $\beta$ ) receptor superfamily and binds TGF- $\beta$ 1, TGF- $\beta$ 3, BMP9 and BMP10 (Castonguay  
60 et al., 2011; Cheifetz et al., 1992). Like betaglycan (TGBR3), this single-pass transmembrane protein  
61 works as an ancillary receptor by modulating the signaling activity of the heterotetrameric receptor  
62 complex constituted of type I and type II serine-threonine kinase receptors which phosphorylate R-  
63 Smads which eventually associates with Co-Smad (Smad4) to form a complex that regulates the  
64 transcription of target genes via Smad Binding Elements (SBE). Endoglin is mainly expressed in  
65 endothelial cells (EC) and Endoglin deficient mice die around E10.5 from cardiovascular defects  
66 associated with improper vascular smooth cell coverage (Li et al., 1999). In addition to endothelial cell  
67 expression, in mammals, Endoglin is also expressed in neural crest cells and derivatives such as vascular  
68 smooth muscle cells responsible for blood vessel stabilization and vascular tone control and in  
69 Hematopoietic Stem cells (HSCs) as they emerge from intraaortic clusters to later being restricted to  
70 HSCs with long term repopulating capacities (LT-HSCs) (Chen et al., 2002; Mancini et al., 2007).

71 In humans, inactivating mutations in endoglin (ENG) gene are responsible for type 1 Hereditary  
72 Hemorrhagic Telangiectasia (HHT) while HHT2 is due to mutations affecting ACVRL1 (ALK1) a type I  
73 TGF- $\beta$  receptor specifically expressed in endothelial cells. Together, HHT1 and HHT2 account for  
74 approximately 85% of diagnosed HHT cases (McDonald et al., 2015), for review. Endoglin and ALK1  
75 independent HHT cases rely on mutations affecting protein function of BMP9, a high affinity ligand for  
76 ALK1, microprocessor RNase III Droscha and additional uncharacterized loci while mutations in SMAD4  
77 are causative of Juvenile Polyposis-HHT (Gallione et al., 2006; Jiang et al., 2018; Wooderchak-Donahue  
78 et al., 2013).

79 Also known as Rendu-Osler-Weber syndrome, HHT is a rare inherited autosomal dominant genetic  
80 disorder characterized by a wide array of symptoms among which mucocutaneous telangiectasias and  
81 recurrent epistaxis are the foremost diagnosis cues. These angiodysplastic lesions or arteriovenous  
82 malformations (AVMs) also often affect organs such as the gastrointestinal tract, the lungs, the liver  
83 and the brain. They consist of dilated veins prone to rupture under mechanical strains. These AVMs  
84 resulting from the loss of the arteriolar-capillary plexus connect venous vessels directly to arteries  
85 exposing the former to arterial-type blood flow mechanics (for review (Guttmacher et al., 1995)).

86 Although much concern arise from brain, liver or lung AVMs which can have life-threatening outcomes,  
87 massive blood loss from hemorrhages affecting the gastrointestinal tract or from recurrent epistaxis  
88 are also important issues as it results in iron deficiency anemia that requires medical management by  
89 way of regular iron replenishing cures and/or blood transfusion (Stross, 2013).

90 Congestive heart failure constitutes another critical clinical manifestation of HHT although considered  
91 fairly rare. Cases seem to be mostly associated with liver AVMs and chronic anemia of iron deficiency  
92 type (Cho et al., 2012; Goussous et al., 2009; Montejo Baranda et al., 1984; Wu et al., 2017)  
93 Albeit different in terms of incidence in specific organs such as brain or liver which is much higher in  
94 HHT1, all HHT forms rely on mutations affecting genes working on a common TGF- $\beta$ /BMP pathway and  
95 recent findings regarding Droscha indicate that non-classical TGF- $\beta$ /BMP pathways are also involved  
96 (Letteboer et al., 2006). Thus, while this pathway is indisputably at the core of the pathology, tissue  
97 specific cues or vascular bed specificities might provide a terrain that will somehow trigger or favored  
98 the onset of the pathology. In humans, HHT relies on hemizygous mutations and accordingly, mice  
99 carrying a single knockout Endoglin allele do spontaneously develop HHT-like phenotypes with varying  
100 penetrance depending on genetic background (Bourdeau et al., 1999). This collectively refers to as the  
101 “second hit” concept by which additional alterations would be required for the development of the  
102 pathology. Consistent with this concept, angiogenic/inflammatory environments have been found to  
103 be potent drivers of AVM formation in both heterozygous knockout Endoglin and ALK1 mouse models  
104 (Tual-Chalot et al., 2015).

105 Several recent studies using BMP9/10 blocking antibodies, inducible tissue specific Endoglin, ALK1 and  
106 Smad4 knockout mouse models as well as Endoglin genome editing in zebrafish have provided  
107 important insights into the cellular and molecular mechanisms governing AVM formation which  
108 involves inappropriate signaling responses to blood flow including EC polarization, venous/arterial  
109 identity maintenance, proliferation and pericyte recruitment (Baeyens et al., 2016; Jin et al., 2017; Ola  
110 et al., 2016; Ola et al., 2018; Sugden et al., 2017). In keeping with this, in HUVECs, laminar shear stress  
111 triggers Endoglin association with ALK1 and potentiates ALK1 signaling pathway in response to  
112 endogenous serum BMP9/10 concentration (Baeyens et al., 2016).

113 In this work, we examined the consequences of Endoglin loss in postembryonic stage zebrafish. Using  
114 a CRISPR/Cas9 endoglin mutant, we demonstrated that homozygous mutants massively die from  
115 congestive cardiomyopathy from about 1 month old accompanied with iron deficiency anemia. We  
116 found that this pathological condition sets just before 15dpf when hypoxia and cardiac stress markers  
117 start increasing in mutants and coincide with heart chamber enlargement which involves  
118 cardiomyocyte proliferation. Data from histology and imaging of blood vessel organization during gill  
119 development strongly suggest that hypoxia stems from improper gill functioning due to Endoglin direct  
120 activity in this organ. Controlling hematocrit/blood viscosity triggered by chronic hypoxia markedly  
121 lessens hypoxic response, cardiac stress to result in enhanced survival of Endoglin deficient fish. Thus,  
122 by reproducing important features of HHT, our zebrafish model of Endoglin deficiency will provide the  
123 ground for future detailed molecular analysis that will be important for both the identification of HHT  
124 altered signaling pathways and the development of new treatments.

## 125 **Results**

### 126 ***Zebrafish endoglin locus, transcripts and expression characterization***

127 To develop tools to address Endoglin expression and function in zebrafish, we first characterized  
128 *endoglin* locus and associated transcripts in this organism. We conducted 5' and 3' RACE experiments  
129 and obtained complete and trustful sequences. This allowed to reconstruct exon-intron organization  
130 of zebrafish endoglin gene, essential for gross mapping of transcriptional regulatory regions. We  
131 identified 3 previously undescribed exons (Fig. 1A). Two were non-coding exons, one very short located  
132 the utmost 5' positioning Endoglin Transcription Start Site and one 3' containing most of Endoglin  
133 3'UTR. The third identified exon (exon 13 in our nomenclature) corresponded to an alternate exon  
134 which introduces an early termination codon resulting in an Endoglin protein isoform with a very short  
135 cytosolic domain (Fig. 1B and Fig. 1C), an isoform also expressed in mammals (Bellón et al., 1993). By  
136 contrast to Long isoforms, phylogenetic alignments revealed little or no residue conservation in the  
137 cytosolic tail of Short isoforms (Fig. 1D). RT-PCR analysis demonstrated that both variants were  
138 expressed in embryonic and adult tissues, endoglin messenger for the short isoform being markedly  
139 less abundant (Fig. 1B). Similar analysis performed on developmentally staged embryos indicated that  
140 with exception of a marginal maternal contribution, the zygotic expression of endoglin coincided with  
141 early somitogenesis and gradually expanded in later stages with a somewhat stable Long isoform/Short  
142 isoform ratio (Fig. 1E). Whole-mount *in situ* hybridization experiments detected endoglin expression  
143 in developing blood vessels with the highest endoglin expression mostly associated with veins (Fig. 1F).  
144 In line with early findings in mammals, our data also confirmed the results from a previous study in  
145 zebrafish (Sugden et al., 2017) and suggested of a conserved Endoglin function throughout the whole  
146 vertebrate phylum.

147

### 148 ***CRISPR/Cas9 generation of endoglin mutant zebrafish***

149 To address Endoglin function in zebrafish, we used a CRISPR/Cas9 approach based on a guide RNA  
150 overlapping with endoglin ATG located on exon 2. To avoid potential deleterious effects of Endoglin  
151 inactivation such as observed in mouse, fish from 2 different injection setups (1-2 cell-stage (early)  
152 versus 4-16 cell-stage (late)), intended that late-stage injection would result in higher mosaicism and  
153 survival, were raised to adulthood. Analysis of germline presence of indels in sperm samples or in  
154 clutches from mating with wild type fish detected indels in 18% (2/11) and 94% (32/34) of fish resulting  
155 respectively from early and late injections indicating that late-stage injection indeed circumvented  
156 lethality. Interestingly, numerous fish did not recover from anesthesia/sperm sampling and massive  
157 bleeding from the gills was systematically observed in these fish. By contrast with fish recovering  
158 normally from the sampling procedure, bleeders were indel carriers. We, however, managed to obtain  
159 a single clutch from one male which died during re-sampling from which we derived the line analyzed

160 in this study. This founder ( $F_0$ ) transmitted to 26.4% of the progeny (27/102) a unique indel consisting  
161 in a 2bp deletion and a C>A or T>A base change thus destroying endoglin translation initiation ATG  
162 codon and nucleotide -1 and -2 of endoglin Kozak sequence (Fig. 2A). Among  $F_1$ , some fish later found  
163 to carry a mutated allele died at a juvenile stage (3-4 weeks) and some other showed overt redness  
164 later on but the vast majority developed normally and were indiscernible from wild-type siblings.  
165 Taken together these data suggested that endoglin mutation would be correlated with late  
166 development and/or survival issues in zebrafish.

167

### 168 ***Endoglin deficient zebrafish massively die from congestive heart failure.***

169 Above observations along with Endoglin established role in HHT and midgestation lethality in  
170 homozygous knockout mice prompted us to analyze the effect of endoglin mutation in incrosses of  
171 heterozygotes fish. By 3dpf, we observed a strong modification of blood flow pattern in a dilated dorsal  
172 aorta (DA) – Posterior cardinal vein (PCV) loop and a poor perfusion of Intersegmental vessels (ISVs)  
173 (Fig. 2B). RT-qPCR demonstrated that endoglin messenger abundance was reduced by 36.6% and  
174 26.2% in homozygous mutants ( $eng^{-/-}$ ) compared to wild-type and siblings, respectively, which could  
175 reflect nonsense mRNA decay induced by deleterious mutation (Supplementary Fig. S1A). Altogether  
176 our results confirmed earlier report (Sugden et al., 2017) and strongly suggested that the mutation we  
177 created also corresponded to a null allele. Endoglin mutation effect was evaluated in survival  
178 experiments from 3dpf onwards. Kaplan-Meier survival plots showed a high mortality rate of  $eng^{-/-}$  fish  
179 (Figure 2C). Indeed, while 63.5% of  $eng^{+/+}$  and 59.6% of  $eng^{+/-}$  survived up to 5 months only 16.8% of  
180  $eng^{-/-}$  managed to reach this age. Data indicated that  $eng^{-/-}$  started to die massively by the age of 1  
181 month-old and displayed a median survival of 44 days. A fraction of  $eng^{-/-}$  fish survived the 5 months  
182 period but survival figures underestimated the severity of the phenotype as over half (7/13) of  $eng^{-/-}$   
183 surviving fish never reached adulthood and stalled in a 11-17mm length range that precluded  
184 macroscopic gender determination. Surprisingly,  $eng^{-/-}$  individuals reaching adulthood were found to  
185 be almost exclusively phenotypic males (Fig. 2D). Because zebrafish sex is not assigned chromosomally,  
186 this could reflect either a genuine bias towards males or a higher sensitivity of females to Endoglin  
187 deficiency. Examination of  $eng^{-/-}$  at 30dpf i.e. the very onset of lethality revealed that most fish  
188 exhibited a red enlarged cardiac area whereas the rest of the body appeared paler than siblings (Fig.  
189 2E). We also noticed that, by contrast with siblings,  $eng^{-/-}$  were hyperventilating and displayed a  
190 marked surface respiratory behavior (SRB). To get a better insight into the cardiac issue, we analyzed  
191 histological sections of the cardiac region (Fig. 2f). From these, the ventricle of  $eng^{-/-}$  appeared  
192 dramatically oversized. Red blood cells in  $eng^{-/-}$  did not present the characteristic orange color resulting  
193 from eosin reaction with hemoglobin, seen in siblings thus revealing a decrease in hemoglobin content.  
194 Surrounding connective tissue also appeared loose indicating that edema, an accompanying symptom

195 of heart dysfunction, was also taking place. Altogether this data demonstrated that Endoglin deficient  
196 fish developed congestive heart failure as well as anemia with lethal outcome.

197

### 198 ***A single endoglin mutant allele is sufficient to induce pathology***

199 Based on macroscopic analysis, 3 month old or older *eng*<sup>-/-</sup> surviving fish fell into 3 classes of phenotype  
200 severity: 1) fish with arrested growth, hyperventilating and with recurrent enlarged cardiac area, 2)  
201 adult size fish hyperventilating with enlarged cardiac area to various degrees, 3) fish macroscopically  
202 asymptomatic (Supplementary Fig. S2). Interestingly, a fraction of *eng*<sup>+/-</sup> was also found to be  
203 symptomatic i.e. hyperventilating with occasionally enlarged cardiac area (Supplementary Fig. S2).  
204 Symptomatic *eng*<sup>+/-</sup> were observed around one month old and raised apart to monitor the evolution  
205 of phenotypes and life expectancy. Collective data from two independent experiments indicated that  
206 the frequency of symptomatic *eng*<sup>+/-</sup> averaged 14% ± 3% of total *eng*<sup>+/-</sup> (16/114). In addition to  
207 hyperventilation and SRB, their most striking feature was their marked ruddy complexion which  
208 persisted as they completed growth to adulthood as well as the occasional presence of dilated surface  
209 vessels reminiscent of telangiectasias (Supplementary Fig. S3). Although the number of such animals  
210 was too low to significantly affect heterozygotes overall survival rate, we did observe a higher  
211 frequency of death events in this group (Fig. 2C, arrowheads) resulting in an estimated 5-month  
212 survival of 37.5% (6/16). Thus, similar to HHT1 mouse model, a single mutated endoglin allele resulted  
213 in pathological conditions with limited penetrance and were in line with the “second hit” concept, in  
214 zebrafish as well.

215

### 216 ***Early detection of concomitant hypoxic and cardiac stress responses in Endoglin deficient zebrafish***

217 Hypoxia being a potent driver of cardiac remodeling involving cardiomyocyte hypertrophy in mammals  
218 and both proliferation and hypertrophy in zebrafish (Jopling et al., 2012; Ke et al., 2017; Sun et al.,  
219 2009), we reasoned that it might trigger heart failure in our model. Supporting this hypothesis,  
220 hyperventilation and SRB appeared as characteristic manifestations in *eng*<sup>-/-</sup>. First, we monitored the  
221 expression of cardiac stress markers, i.e. atrial- and brain-type natriuretic peptides *nppa* and *nppb*  
222 respectively, to define when the heart of *eng*<sup>-/-</sup> started being at stake. Using RT-qPCR, we found that  
223 by 15dpf, when compared to siblings, *eng*<sup>-/-</sup> exhibited a 1.8 and a 3.3 fold induction of *nppa* and *nppb*  
224 respectively. These differences in expression between *eng*<sup>-/-</sup> and siblings then expanded to reach up to  
225 49 and 223 fold change of *nppa* and *nppb* abundance respectively, consistent with the gradual  
226 enlargement of *eng*<sup>-/-</sup> heart region over time (Fig. 3A). We, thus, analyzed the expression of well  
227 accepted hypoxia-responsive genes *egln3* (prolyl hydroxylase 3) and *epoa* (erythropoietin) in the very  
228 same samples. RT-qPCR revealed a 2.1 fold increased expression for *egln3* and 1.5 for *epoa* by 15dpf  
229 in *eng*<sup>-/-</sup> fish when compared to siblings. Hypoxia responsive gene expression steadily rose to 6.8 and



230 14.9 fold increase of *egln3* and *epoa* respectively in *eng*<sup>-/-</sup> in regard to siblings by 30dpf (Fig. 3B). To  
231 verify that early difference in *nppa* and *nppb* would reflect heart response to increase workload rather  
232 than a direct response to hypoxia (Stockmann et al., 1988), we measured ventricle volume of siblings  
233 and *eng*<sup>-/-</sup> at 10, 12 and 15dpf. While this volume was similar between *eng*<sup>-/-</sup> and siblings at both 10  
234 and 12dpf, it appeared significantly increased in mutants at 15dpf (Fig. 3C). Although similar to stress  
235 markers in its trend, hypoxia response appeared far more limited in its extent thus strongly suggesting  
236 that hypoxia triggered cardiomegaly in *eng*<sup>-/-</sup>. Finally, to define how the heart would specifically  
237 respond to hypoxic cues in Endoglin deficient fish, we performed FACS analysis to monitor changes in  
238 cardiomyocyte abundance. Analysis of *cmlc2:GFP*<sup>pos</sup> cardiomyocytes in cell suspensions from whole  
239 fish revealed a recurrent increase of *GFP*<sup>pos</sup>/total cell ratio in 15dpf and older *eng*<sup>-/-</sup> indicating enhanced  
240 cardiomyocyte proliferation (Fig. 3D) consistent with a direct proliferative effect of hypoxia on  
241 cardiomyocytes (Jopling et al., 2012).

242

#### 243 ***Hypochromic Anemia is not the primary trigger of heart failure in Endoglin deficient fish***

244 As anemic mutants such as *riesling* (Liao et al., 2000), *merlot*, *chablis* (Shafizadeh et al., 2002) or *retsina*  
245 (Paw et al., 2003) were reported to develop cardiomegaly as the result of cardiac compensation for  
246 oxygen transport, we sought to define whether hypochromic anemia observed in *eng*<sup>-/-</sup> fish could  
247 account for hypoxia detected by 15dpf. We thus performed a series of o-dianisidine staining in a time  
248 course that spanned over the onset of hypoxia and cardiac stress i.e 3, 5, 10 and 15dpf, to evaluate  
249 hemoglobin content. No diminished staining was observed in *eng*<sup>-/-</sup> at any given time point when  
250 compared with siblings with, inversely, a trend towards enhanced staining in *eng*<sup>-/-</sup> group at 15dpf  
251 which would likely reflect increased *epoa* levels at this point (Supplementary Fig. S4). This results  
252 indicated that anemia was not the primary cause of hypoxia but a late secondary acquired feature of  
253 Endoglin deficiency that would undoubtedly enhance hypoxia.

254

#### 255 ***Endoglin deficient fish exhibits defects in gill blood vessel development***

256 Since in *eng*<sup>-/-</sup> fish increased *epoa* levels and cardiac compensation failed to correct hypoxia, we  
257 hypothesized that chronic hypoxia might reflect respiratory issues. This was supported by bleedings  
258 from the gills observed in F<sub>0</sub> indel carriers. Analysis of histological sections from 30dpf fish revealed  
259 that *eng*<sup>-/-</sup> gills were structurally abnormal. Lamellae were unusually short and crooked and supplying  
260 blood vessels were markedly enlarged notably in the fourth branchial arch (AA6) (Fig. 4A). We thus  
261 compared sibling and *eng*<sup>-/-</sup> gill vascular architecture at 10, 12 and 15dpf in *Tg(kdrl:GFP)*,  
262 *Tg(flt-1:Tomato)* transgenic background (Fig. 4B). Although gill vasculature is an arterio-arterial system  
263 (Olson, 2002), Flt-1 arterial marker was found mostly associated with afferent branches, whereas *kdrl*  
264 promoter appeared evenly active in both afferent and efferent parts of the gill vasculature. As early as

265 10dpf, differences could already be noticed: vascular loops (afferent/efferent) were shorter in mutants  
266 (arrowheads) and the efferent artery of the fourth branchial arch was substantially dilated (asterisk).  
267 This differences exacerbated later on and by 15dpf while pan-vascular endothelium *kdrl* reporter  
268 expression remained essentially unchanged, we observed a dramatic loss of Flt1 reporter activity in  
269 the afferent arterial gill vascular network suggesting that arterial identity might be affected. Finally, to  
270 ascertain Endoglin direct role in gill formation, we analyzed endoglin expression by whole-mount *in*  
271 *situ* hybridization on wild-type fish. Endoglin transcripts were detected in developing gills of 10dpf  
272 larvae although expression appeared rather faint, it followed branchial arches pattern and was also  
273 detected in the paired anterior dorsal aortas. Expression strengthened and spread out by 12 and 15dpf  
274 indicating that Endoglin expression was not restricted to major arteries supplying and collecting blood  
275 but also in filamental arteries and lamellae (Figure S5A and S5B). Notably, Endoglin expression  
276 appeared absent in heart at these stages indicating that heart failure in *eng*<sup>-/-</sup> arose from extrinsic  
277 issues. These data showed that, in *eng*<sup>-/-</sup> fish, important alterations of gill vasculature worsening with  
278 time took place ahead of hypoxia and suggested that defective gill function resulted in hypoxemia  
279 leading to tissue hypoxia.

280

### 281 ***Hypoxia-induced erythropoiesis is detrimental to endoglin deficient fish.***

282 To define how hypoxia specifically contributed to heart failure in *eng*<sup>-/-</sup> fish, we treated wild-type fish  
283 with hemolytic agent phenylhydrazine, a versatile model of hypoxia. To match the onset of hypoxia,  
284 phenylhydrazine (phz) was applied every other day from 14dpf up to 75dpf, then fish were allowed to  
285 recover. First, we assessed hypoxic and cardiac stress response in 30dpf fish. While hypoxia markers  
286 gradually increased with phz concentration and plateaued at 5 µg/ml (Supplementary Fig. S6B upper  
287 panels), only phz harshest condition led to a notable increase in cardiac stress markers expression  
288 (Supplementary Fig. S6B lower panels), suggesting that *nppa* and *nppb* would be at best weak hypoxia  
289 responsive genes in zebrafish. In 5µg/ml phz treated fish, *nppa* reached a 2.33 ±0.16 and *nppb* 6.51  
290 ±0.84 fold activation whereas *egln3* was induced by 3.14 ±0.1 and *epoa* by 2.82 ±0.2 folds. Thus, while  
291 hypoxic response in phz treated wild-type and *eng*<sup>-/-</sup> seemed in the same range of magnitude, cardiac  
292 stress in phz treated fish appeared overtly marginal (see Fig. 3a, 3b and 5a for comparison). We  
293 observed a strict correlation between the extent of heart area enlargement and cardiac stress markers  
294 levels but both appeared rather limited compared to *eng*<sup>-/-</sup> at matching age (Supplementary Fig. S6A).  
295 Phz treatment had no effect on survival up to this age. Prolonged treatment affected survival in a dose-  
296 dependent manner but stayed marginal (Supplementary Fig. S6C). Furthermore, analysis of sex-ratio  
297 at 3 month, after one month recovery, did not reveal male gender bias one would expect from a  
298 hypoxia-related effect (Supplementary Fig. S6D). Collectively, these results showed that chronic  
299 hypoxia *per se* did not result in cardiac issue reminiscent of that observed in *eng*<sup>-/-</sup> fish. We, thus,

300 hypothesized that increased hematocrit/blood viscosity resulting from acute erythropoiesis and  
301 natriuresis (hemoconcentration) could explain these discrepancies. Indeed, 30dpf *eng*<sup>-/-</sup> kidney, fish  
302 definitive hematopoiesis organ, displayed increased cellularity, indicative of reactive erythropoiesis,  
303 blood smears from 25 and 30dpf *eng*<sup>-/-</sup> revealed high content in erythrocytes, most with immature  
304 shape and abnormal staining when compared to siblings and adult surviving *eng*<sup>-/-</sup> showed increased  
305 hematocrit when compared to wild-type adult fish (Supplementary Fig. S7A, S7B and S7C respectively).  
306 To modulate hematocrit/blood viscosity, we treated *eng*<sup>-/-</sup> and siblings with 0.625, 1.25 and 2.5 µg/ml  
307 phz, concentrations that exerted minimal effect on hypoxia and cardiac stress in wild-type fish  
308 (Supplementary Fig. S6B). These low phz concentrations showed no overt effect on siblings compared  
309 to untreated counterparts. By contrast, phz treated *eng*<sup>-/-</sup>, appeared healthier with less prominent  
310 cardiomegaly (not shown). We used qPCR to measure both hypoxia and cardiac stress in these different  
311 settings (Fig. 5A). Similar to Fig. 3A and 3B, *eng*<sup>-/-</sup> group exhibited a mean 9.3 fold *egln3*, 5.9 fold *epoa*,  
312 31.4 fold *nppa* and 344 fold *nppb*, increase over siblings. On siblings, phz, regardless its concentration,  
313 induced modest increases of *egln3*, *epoa*, *nppa* and *nppb* expression over non-treated siblings, while  
314 on *eng*<sup>-/-</sup>, phz reduced *nppa* and *nppb* expression levels (*nppa* mean fold increase over non-treated  
315 siblings group for *eng*<sup>-/-</sup> treated with phz at 0.625, 1.25 and 2.5µg/ml = 18.7, 17.6 and 19.7 respectively)  
316 (*nppb* mean fold increase over non-treated siblings for *eng*<sup>-/-</sup> treated with phz at 0.625, 1.25 and  
317 2.5µg/ml = 57.8, 139.6 and 61.9, respectively). Phz also reduced hypoxic response markers expression  
318 in *eng*<sup>-/-</sup> (*egln3* mean fold increase over non-treated siblings group for *eng*<sup>-/-</sup> treated with phz at 0.625,  
319 1.25 and 2.5µg/ml = 4.1, 4.5 and 4.8 respectively) (*epoa* mean fold increase over non-treated siblings  
320 for *eng*<sup>-/-</sup> treated with phz at 0.625, 1.25 and 2.5µg/ml = 4.2, 4.1 and 6.3, respectively) indicating that  
321 heart failure further worsened oxygenation. We, thus, evaluated whether phz treatment would  
322 provide long-term benefit on *eng*<sup>-/-</sup> fish health. Fish were treated with either 0.625µg/ml or 1.25µg/ml  
323 phz every other day from 14dpf and allowed to recover from 60dpf to 75dpf. As in Fig. 2C, *eng*<sup>-/-</sup> survival  
324 was severely impaired compared to siblings with a 16.4% survival at 75dpf (median survival=43 days),  
325 while survival of phz treated *eng*<sup>-/-</sup> was markedly enhanced with 41.7% for phz0.625 group and 32.1%  
326 for phz1.25 group (median survival of phz0.625 and phz1.25 group equals 61.5 and 60 days,  
327 respectively) (Fig. 5B). Further highlighting phz relieving effect on *eng*<sup>-/-</sup> symptoms, treatment allowed  
328 higher *eng*<sup>-/-</sup> fractions to reach adulthood and corrected gender bias toward males (Fig. 5C). These  
329 results showed that, in *eng*<sup>-/-</sup> fish, hypoxia response failed to work as compensation mechanism but  
330 instead brought the pathology to a higher degree.

331

332 Altogether our results demonstrated that Endoglin deficiency in zebrafish induced heart failure  
333 through both direct and indirect effects of hypoxia which stemmed from gill dysfunction. Hypoxia was

334 certainly reinforced by hypochromic anemia and massive hemorrhages from the intestinal tract  
335 (Supplementary Fig. S8).

## 336 **Discussion**

337 In the present work, we described the generation of a Crispr/Cas9 endoglin zebrafish mutant and the  
338 consequences of Endoglin deficiency in post-embryonic stages. We showed that mutant fish massively  
339 die from congestive heart failure induced by chronic hypoxia resulting from gill dysfunction. We also  
340 found evidence of anemia and observed intestinal hemorrhages that surely further worsen the cardiac  
341 pathology. Finally, we showed that health and survival could be strongly enhanced by hemolytic agent  
342 phenylhydrazine treatment demonstrating that increased hematocrit/ blood viscosity induced by  
343 hypoxia is the main driver of heart failure in Endoglin deficient fish.

344 Zebrafish endoglin locus expresses two distinct transcripts via the use of an alternate exon introducing  
345 an early translation stop resulting in two Endoglin proteins with unique cytosolic sequences. Similar  
346 isoforms are also expressed in mammals (Bellón et al., 1993). However, in the latter, Endoglin short  
347 isoform is produced by an intron retention mechanism involving Splicing Factor 2 (ASF/SF2) (Blanco  
348 and Bernabeu, 2011). Zebrafish Endoglin overall similarity with mammal orthologs is globally low but  
349 the cytosolic region of the long isoform is remarkably homologous to that of mammals which interacts  
350 with proteins such as GIPC,  $\beta$ -arrestin2 and NOS3 (Lee and Blobel, 2007; Lee et al., 2008; Toporsian et  
351 al., 2005). Zebrafish short isoform adds to the wide diversity of sequence of short Endoglin cytosolic  
352 domain found in mammals which fluctuates according to the position or the absence of translation  
353 stop in retained intron (Blanco and Bernabeu, 2011), and suggests that short isoform cytosolic domain  
354 has no protein binding function. Conservation underscores that both Endoglin isoforms should be  
355 essential although the short isoform seems absent in reptiles and birds. In mammals, Endoglin short  
356 isoform is induced in senescent ECs and transgenic mice overexpressing this isoform are hypertensive  
357 and insensitive to NO synthesis inhibitor L-NAME (Blanco et al., 2008). A soluble form (S-Endoglin) is  
358 also produced by cleavage of the ectodomain by MMPs and can exert paracrine or remote activity  
359 using exosomes as vehicle (Ermini et al., 2017). High S-Endoglin levels correlate with preeclampsia and  
360 induce hypertension by inhibiting TGF- $\beta$ -NOS axis (Venkatesha et al., 2006). Further work will be  
361 necessary to establish whether S-Endoglin is actually produced in zebrafish but sequence analysis  
362 indicates that ectodomain Glu-Leu residues essential for MMP14 cleavage in mammals, are conserved  
363 (Hawinkels et al., 2010).

364 In zebrafish, by contrast with mammals, Endoglin participation in ALK1 signaling seems highly  
365 questionable. Expression patterns marginally overlap during development and differences in lethality  
366 timing between ALK1 and Endoglin mutants (7-10 vs 30dpf, respectively) rather argue against a  
367 function on a shared pathway (Roman et al., 2002). Moreover, ALK1 mutants exhibit enlarged cranial  
368 blood vessels due to impaired EC ability to migrate against blood flow (Corti et al., 2011; Rochon et al.,  
369 2016; Roman et al., 2002). These defects are phenocopied by ALK1 or both bmp10 and bmp10-like  
370 morphants demonstrating that BMP10s signal through ALK1 to control cranial blood vessel caliber

371 (Laux et al., 2013). This phenotype is, by contrast, absent in Endoglin mutants and morphants (not  
372 shown) indicating that Endoglin is dispensable for BMP10-ALK1 signaling in this respect. Conversely,  
373 phenotypes of Endoglin mutant (this study and previous report (Sugden et al., 2017)) i.e accelerated  
374 blood flow in a simple DA/PCV vascular loop is not described in ALK1 deficient zebrafish embryos  
375 indicating that Endoglin contribution to ALK1 pathway is not restricted to a specific vascular bed either.  
376 ALK5 seems neither an alternate candidate receptor as both *alk5a* and *alk5b* are overtly absent in axial  
377 blood vessels by the time Endoglin deficiency induces changes in blood flow pattern (Park et al., 2008).  
378 Recent data, in mammals, suggest that Endoglin could act outside of TGF $\beta$ /BMP signaling. Endoglin  
379 was indeed found to interact with VEGF-R2 and promoted its signaling in response to VEGF (Tian et al.,  
380 2018). Further investigation will definitely be required to define whether, in zebrafish, phenotypes  
381 induced by Endoglin deficiency could be related to this specific signaling. Interestingly, ALK1  
382 conditional knockout in adult mice results in high output heart failure and anemia (Morine et al., 2017).  
383 EC-specific endoglin knock-out in adult mice, also results in high-output heart failure induced by AVM  
384 formation in the pubic symphysis as the result of exacerbated VEGF-R2 receptor signaling in Endoglin  
385 deficient condition (Tual-Chalot et al., 2020). Thus, ALK1-Endoglin interaction might be required at  
386 later stages in zebrafish. ALK1 mutant early lethality precludes analysis of its function in gill vascular  
387 development. But, it will be interesting to assess whether constitutively active ALK1 or soluble VEGF-  
388 R1 would rescue heart issue in Endoglin deficient zebrafish.

389 Our results demonstrate that zebrafish Endoglin deficiency elicits a chronic hypoxic response. In  
390 normoxia, HIFs (HIF-1 $\alpha$ /HIF-2 $\alpha$ ) are hydroxylated on specific proline by prolyl hydroxylases (PHDs)  
391 which use O<sub>2</sub>, 2-oxoglutarate, ascorbate and ferrous iron ions (Fe<sup>2+</sup>) as cofactors. Hydroxylated HIFs  
392 are recognized by the Von Hippel Lindau protein (pVHL) component of E3 ubiquitin ligase complex  
393 leading to HIFs polyubiquitylation and ultimately HIFs degradation by the proteasome. Conversely,  
394 hypoxia hampers PHD activity leading to HIFs stabilization, nuclear translocation and transcription  
395 factor complex formation with HIF-1 $\beta$ /ARNT and regulation of specific sets of genes (Ivan and Kaelin,  
396 2017). Iron deficiency leads eventually to anemia due to the essential contribution of iron to the haem  
397 complex essential to hemoglobin for oxygen transport. Iron free diet represses iron reabsorption  
398 inhibitor Heparin by a HIF-dependent transcriptional repression mechanism (Peyssonnaud et al.,  
399 2007). In keeping with this, hypoxia mimetics desferrioxamine and cobalt or nickel chloride all inhibit  
400 Prolyl hydroxylases (PHD) by interfering with ferrous iron (Muñoz-Sánchez and Cháñez-Cárdenas,  
401 2019). Endoglin deficient fish exhibit features highly reminiscent of *vhl* zebrafish mutants which model  
402 Cuvash syndrome. These mutations abolish *vhl* ability to associate with HIF factors and lead to the  
403 constitutive activation of HIF-dependent pathways in normoxia. *Vhl* mutants exhibit exacerbated  
404 erythropoiesis in response to Epo overexpression which results in a form of polycythemia with  
405 immature and hypochromic characteristics. Mutant fish also exhibit a hyperventilation phenotype

406 which stems from the direct action of Epo on respiratory neurons and develop congestive heart failure,  
407 edema and eventually die by 11dpf (van Rooijen et al., 2009). In mouse, liver-specific deletion of VHL  
408 results in HIF-mediated Heparin binding epidermal growth factor receptor (Hepcidin) repression and Epo induction leading to excessive (polycythemia)  
409 microcytic and hypochromic erythropoiesis. Thus, despite converging mechanisms set to mobilize iron  
410 and red blood cell production, conditions of chronic HIF stabilization end up invariably in an imbalance  
411 between Epo and iron levels (Peyssonnaud et al., 2007).

412 Chronic hypoxia induces cardiomegaly in both fish and mammals but unlike mammals where  
413 cardiomyocytes undergo size increment (hypertrophy), fish cardiomyocytes are able to re-enter cell  
414 cycle after dedifferentiation (Jopling et al., 2010). Our data, although indirectly, show that  
415 cardiomyocyte proliferation is indeed enhanced in Endoglin deficient fish in a timetable that matches  
416 hypoxia. Recent reports have shed light as to how HIF activation induces cardiomegaly through  
417 cardiomyocyte hypertrophy and cardiac remodeling : Hypoxia Inducible Mitogen Factor (HIMF), a non-  
418 canonical ligand of Calcium Sensing Receptor (CaSR) controls *in vitro* and *in vivo* cardiomyocyte  
419 hypertrophy by activating HIF, CaN-NFAT and MAPKs pathways (Kumar et al., 2018; Zeng et al., 2017).  
420 HIMF potential orthologs while present in the genome of some fish i.e. *Erpetoichthys calabaricus*, are,  
421 to date, absent in zebrafish databanks.

422 By contrast with *vhl*, hypoxic response in endoglin mutants is gradually acquired thus indicating that  
423 Endoglin does not control HIF activation. Instead, our data strongly argue in favor of a faulty respiratory  
424 system. Fish extract water dissolved oxygen through their gills, a highly complex respiratory organ  
425 composed of multiple functional units called lamellae. Bridging afferent and efferent circulation,  
426 lamellae are thin flat vascular sinusoids of endothelial and non-endothelial pillar cells ensheathed by  
427 a layer of pavement epithelial cells (Olson, 2002). In zebrafish, gills lamellae were found to form around  
428 12-14dpf to reach their definitive adult morphology by about 4 weeks (Rombough and Drader, 2009).  
429 They develop on a scaffold of vascular loops composed of afferent and efferent parts linking ventral  
430 aorta to lateral and dorsal aorta through branchial arches. Since structural and molecular alterations  
431 of the gill vasculature are observed in Endoglin deficient zebrafish before or at the very onset of  
432 lamellae formation, these defects would likely directly hamper lamellae development and gill function.  
433 Gill dysfunction will result in hypoxemia leading to poor tissue oxygenation triggering hypoxic  
434 response. It is, thus, not surprising that mutant fish will start to decline by 30dpf which corresponds to  
435 the time when gill structure reaches its fully operative shape in normal zebrafish and that variability in  
436 gill dysfunction allows fish to survive longer periods, not excluding, though, that blood vessel defects  
437 affecting other organs resulting in inappropriate perfusion would reinforce hypoxia.

438 Treating Endoglin deficient fish with hemolytic agent phenylhydrazine has a strong impact on fish  
439 health. Enhanced survival clearly demonstrates that it protects from heart failure. This beneficial effect  
440 of phenylhydrazine, a drug historically used to cure polycythemia vera (Long, 1926), suggests that a

441 form a polycythemia is taking place in Endoglin deficient fish that puts the heart at stake. Interestingly,  
442 in HHT, polycythemia is a complication of pulmonary AVM which, by mixing arterial and venous blood  
443 (right-to-left shunting), results in hypoxemia eventually triggering erythropoiesis (for review (Cottin et  
444 al., 2007; McDonald et al., 2011)). Thus, despite structural difference between fish and human  
445 cardiorespiratory systems, Endoglin deficiency appears to results in similar pathological situations.  
446 Zebrafish has become a choice organism to perform functional screens of bioactive molecules of  
447 therapeutic interest. Hence, by reproducing important features of HHT, both heterozygous and  
448 homozygous Endoglin mutant fish will give us the opportunity to address the 2<sup>nd</sup> hit issue by screening  
449 for drugs able to induce symptoms at a higher frequency, while on the other hand homozygotes will  
450 serve to identify molecules able to rescue both embryonic and post-embryonic phenotypes.



451 **Experimental procedures**

452 ***Zebrafish lines, maintenance and ethics***

453 All zebrafish (*Danio rerio*) lines were produced or maintained in AB genetic background. Transgenic  
454 lines used in this report are: *Tg(myl7:EGFP)* here referred to as *Tg(cmlc2:EGFP)*, *Tg(-0.8flt1:RFP)* here  
455 referred to as *Tg(flt1:Tomato)*, *Tg(kdrl:GFP)*, *Tg(-8.1gata1a:mRFP)* here referred to as *gata1:RFP*.  
456 Embryos were staged according to Kimmel et al. (Kimmel et al., 1995) and blood vessels nomenclature  
457 refers to Isogai et al. (Isogai et al., 2001). All experiments were performed in accordance with the  
458 2010/63/EU Directive and the ARRIVE guidelines (Kilkenny et al., 2010). Procedures used in this study  
459 have been approved by Ethical Committee (#036) as part of an authorized project registered by the  
460 French Ministère de l'Enseignement Supérieur de la Recherche et de l'Innovation under APAFIS  
461 number #23822-2020052717421507 v3 (E. Lelièvre). Animals were housed in a zebrafish facility  
462 registered under Agreement number #A3417237.

463

464 ***Total RNA extraction, semi-quantitative and qRT-PCR analysis***

465 Total RNA was extracted from staged embryos, sibling and *eng*<sup>-/-</sup> fish at specific ages as pool using  
466 Nucleospin RNA kit (Macherey-Nagel) or NucleoZOL (Macherey-Nagel) following manufacturer's  
467 instructions. Equal amounts (500 ng or 1 µg) of total RNA were retrotranscribed using High Capacity  
468 cDNA Reverse Transcription kit (Applied Biosystems) following manufacturer's instruction. Endoglin  
469 variants were amplified by semi-quantitative PCR using Phusion Hot Start II High-Fidelity DNA  
470 polymerase (Thermo Scientific) or HotGoldStar PCR mix (Eurogentec) using 50 ng total RNA equivalent  
471 RT reaction and Endoglin EngExon12fwd 5'-CTGGGCATAGCGTTCGGAGGATT-3', EngExon10fwd  
472 5'-CCTGGGACCTCGAATGTGCTGTAA-3' EngExon15rev 5'-CATGCTGCTGGTGGGTGTGCT-3' specific  
473 primers and Housekeeping gene beta-actin bactinfwd 5'-CCTGGAGAAGAGCTATGAGCTG-3', bactinrev  
474 5'-ATGGGCCAGACTCATCGTACTC-3' primers as control. When necessary, the genotype of samples was  
475 verified by RT-PCR using EngWTFwd, EngMutfwd (see sequence below) and dEngExon5rev  
476 5'-CGTTGGTGACGGATGTGACT-3' according to the semi-quantitative PCR procedure described above.  
477 qPCR reactions were carried out using 1.25 ng total RNA equivalent RT reaction in sensiFAST SYBR No-  
478 Rox mix (Bioline) in presence of 600 nM of each primer. Reactions were assembled in triplicates in 384-  
479 well plates using Labcyte Echo 525 Liquid Handler and PCR reaction was performed using Roche  
480 LightCycler 480 available at MGX - High throughput qPCR facility. PCR reactions were conducted using  
481 following primers : dreegln3fwd 5'-TGGGAAAAGCATTCTGTGCG-3', dreegln3rev  
482 5'-CGGCCATCAGCATTAGGGTT-3', dreepoafwd 5'-CCATTACGCCCCATCTGTGA-3', dreepoarev  
483 5'-GTGACGTTCTGCAATGCT-3', drenppafwd 5'-GACACAGCTCTGACAGCAACA-3', drenpparev  
484 5'-TCTACGGCTCTCTGATGCC-3', drenppbfwd 5'-TGTTTTCGGGAGCAAAGTGA-3', drenppbrev

485 5'-GTTCTTCTTGGGACCTGAGC-3', drerpl13afwd 5'-CGCTATTGTGGCCAAGCAAG-3', drerpl13arev  
486 5'-TCTTGCGGAGGAAAGCCAAA-3'.

487 dreengfwd 5'-AGACGGAGAACGGGACAGAA-3', dreengrev 5'-TCACCACAGACTTGTTCCGCC-3'.

488

#### 489 **5' and 3' Rapid Amplification of cDNA End (RACE) experiments.**

490 For endoglin 5' RACE we used a template-switch strategy based on a previously described procedure  
491 (Pinto and Lindblad, 2010). Briefly, 36hpf total RNA (1 µg) were retrotranscribed from either  
492 5'-CATGCTGCTGGTGGGTGTGCT-3' or 5'-CCATAAAGCACCGGTGAGCAGAA-3' endoglin specific reverse  
493 oligonucleotides (500 nM) using RevertAid H minus reverse Transcriptase (Thermo Scientific) 10 U/µl  
494 in 1X RevertAid H minus Buffer supplemented with 2 U/µl RNase OUT (Thermo Scientific), 1 mM dNTPs  
495 (Thermo Scientific), 2 mM MgCl<sub>2</sub> at 50°C for 1 hour. The template-switch reaction was then conducted  
496 in presence of Template Switch oligonucleotide (1 µM) and 3 mM MnCl<sub>2</sub> and 4 U/µl RevertAid H minus  
497 reverse transcriptase for 90 minutes at 42°C. Reverse transcriptase was finally inactivated by a 10 min  
498 at 70°C step. Then using Template Switch RTs (50 ng total RNA equivalent) as template together with  
499 shortened U\_sense oligonucleotide 5'-GTCGCACGGTCCATCGCAG-3' and endoglin-specific  
500 oligonucleotides 5'-CCATAAAGCACCGGTGAGCAGAA-3' and 5'-GTTTATCCTTTTGACCCGCAGAG-3' as  
501 primers, PCR reactions were performed using Phusion Hot Start II High-Fidelity DNA polymerase  
502 (Thermo Scientific) following manufacturer's instructions. Endoglin 3'RACE was performed using  
503 GeneRacer kit (Thermo Scientific) following manufacturer's recommendations. Briefly, 36hpf total RNA  
504 (1 µg) were used in RT reactions containing 2.5 µM of GeneRacer Oligo dT primer and 10 U/µl of  
505 SuperScript III RT. PCR reactions were then conducted as described above using endoglin-specific  
506 forward primer 5'-CCTGGGACCTCGAATGTGCTGTAA-3' and GeneRacer 3' primer. One percent of whole  
507 PCR was then used as template in nested PCR reactions using endoglin-specific forward primer  
508 5'-CTGGGCATAGCGTTCGGAGGATT-3' and GeneRacer 3' Nested primer. PCR products from 5' and  
509 3'RACE were then cloned blunt into pBSSK(-) vector and sequenced on both strands using T3 and T7  
510 primers.

511

#### 512 **Whole-mount *in situ* hybridization**

513 Whole-mount *in situ* hybridization was performed essentially as previously described (Thisse and  
514 Thisse, 2008). Briefly, wild type AB fish embryos or larvae were fixed overnight at 4°C in 4% PFA, pH  
515 9.5. Digoxigenin-labeled Endoglin antisense riboprobe was synthesized from Endoglin partial cDNA  
516 obtained from 5' RACE (nucleotide 1 to 1454) cloned into pBSSK(-) vector. Samples were pre-hybridized  
517 overnight at 65°C and hybridization was performed overnight at 65°C in presence of 0.4 ng/nl endoglin  
518 antisense probe. Probe was detected using alkaline phosphatase conjugated anti-digoxigenine Fab  
519 fragments (Roche) and NBT/BCIP reagent mix (Roche).

520 ***CRISPR/Cas9 generation of endoglin mutant and genotyping.***

521 One nanoliter of a mixture composed of endoglin targeting gRNA S. pyCas9-3NLS recombinant protein  
522 in 20 mM HEPES pH 7.5, 150 mM KCl was injected into 4- to 16-cell-stage wild type AB embryos. Cas9  
523 recombinant protein and gRNAs were purchased from TACGENE. Fish were raised to adulthood and  
524 indels carriers were screened by T7 Endonuclease I (T7EI) assay following PCR amplification from crude  
525 genomic DNA. T7EI positive samples were sequenced and analyzed using TIDE software  
526 (<https://tide.nki.nl/>). Selected founder F<sub>0</sub> candidates were crossed with wild type AB and progeny (F<sub>1</sub>)  
527 raised to adulthood. Indels carriers were identified using T7EI assay and direct sequencing of PCR  
528 product. A single endoglin mutant line was maintained for further analysis. F<sub>1</sub>, F<sub>2</sub> or F<sub>3</sub> mutation carriers  
529 were then crossed with transgenic reporter lines maintained in AB background. Throughout this study  
530 Endoglin mutation was maintained in a heterozygous status to prevent the potential selection of  
531 individuals able to cope with Endoglin deficiency. Routine genotyping was performed on crude  
532 genomic DNA prepared from caudal fin clips or in the case of survival experiments pieces from dead  
533 larvae or juveniles using an allele specific PCR strategy with engWTFwd  
534 5'-ACAGACGAATCTACAGCCGACAT-3', engMutfwd 5'-AGAACAGACGAATCTACAGCCGAA-3' and  
535 engintron2rev 5'-AGCATGTTTTAACAAGACGGCAG-3' primers and HotGoldStar PCR mix (Eurogentec).

536

537 ***Survival***

538 Dead fish were collected for genotyping to confirm sibling vs *eng*<sup>-/-</sup> status and discriminate wild-type  
539 from heterozygous. Kaplan-Meier survival plots and Log-Rank (Mantel-Cox) statistical analysis were  
540 generated using Prism GraphPad software.

541

542 ***Imaging of blood vessel perfusion***

543 Seventy-two hours post-fertilization (72hpf) GFP<sup>pos</sup> and dsRed<sup>pos</sup> sibling and *eng*<sup>-/-</sup> from crosses  
544 between *eng*<sup>+/-</sup>, *Tg(kdrl:GFP)* and *eng*<sup>+/-</sup>, *Tg(gata1:dsRed)* fish were anesthetized mounted in 0.7% low  
545 melt agarose, MS-322 (160 µg/ml) and imaged on Zeiss AXIO Zoom.V16 mounted with Zeiss AxioCam  
546 MRm with Zeiss HXP 200C illuminator set on minimal power using fixed exposure parameters (GFP 1  
547 sec and CY3 1.5 sec) to obtain red blood cells traces revealing perfusion extent. Similar post-acquisition  
548 treatments were applied to images.

549

550 ***Tissue clearing and deep imaging of whole zebrafish***

551 To get access to *in situ* dimensions of siblings and *eng*<sup>-/-</sup> heart ventricle at 10, 12 and 15dpf, Clutches  
552 from crosses between *eng*<sup>+/-</sup>, *Tg(cmlc2:GFP)* and *eng*<sup>+/-</sup> were screen at 24dpf to sort out GFP<sup>pos</sup>  
553 individuals and at 72dpf to discriminate siblings from *eng*<sup>-/-</sup>. Fish were raised as described earlier and  
554 collected at indicated times by excess of ethyl 3-aminobenzoate methanesulfonate (MS222) (320

555  $\mu\text{g/ml}$ ) and fixed overnight in 4% PFA. Whole zebrafish were depigmented and labeled according to  
556 previously published protocol (Frétaud et al., 2021) using Rabbit anti-mCherry (Rockland, 600-401-P16)  
557 and Chicken anti-GFP (ThermoFisher, A10262) prior to Alexa594 goat anti-rabbit (ThermoFisher,  
558 A11012) and Alexa488 goat anti-chicken (ThermoFisher, A11039). Before imaging, larvae were cleared  
559 by incubation in RIMS (Yang et al., 2014) overnight at RT. Larvae were mounted under #1 coverslips in  
560 RIMS supplemented with 0.8 % low gelling agarose. Images were acquired with a Leica SP8 confocal  
561 microscope using a HCX IRAPO L 25X/0,95NA water immersion objective (#11506340, Leica  
562 microsystems). Ventricule volume is estimated by the simplified ellipsoid volume calculation formula  
563  $V=0.523(\text{width in mm})^2(\text{length in mm})$  (Hoage et al., 2012).

564

### 565 **Confocal imaging**

566 GFP/Tomato positive embryos from crosses between  $eng^{+/-}$ ,  $Tg(kdrl:GFP)$  and  $eng^{+/-}$ ,  $Tg(flt1:Tomato)$   
567 were screened at 72hpf to discriminate siblings from  $eng^{-/-}$ . Fish were raised as described earlier and  
568 collected at indicated times by excess of MS222 (320  $\mu\text{g/ml}$ ) and fixed overnight in 4% PFA. Fixed  
569 zebrafish were mounted in 0.7% low-melt agarose in Fluorodish cover-glass bottom culture dish (WPI)  
570 and imaged on a Zeiss LSM510 confocal microscope. Projections of Z-stack were performed using Fiji  
571 software. Similar post-acquisition treatments were applied to images.

572

### 573 **Flow cytometry**

574  $GFP^{pos}$  siblings and  $eng^{-/-}$  fish from crosses between  $eng^{+/-}$  and  $eng^{+/-}$ ,  $Tg(cmlc2:EGFP)$  fish were sorted  
575 at 3dpf and raised along as described above. At 5, 10, 15, 20 and 25dpf fish were collected as pool of  
576 26, 18, 9, 7 and 7 fish respectively and dissociated in 0.25% Trypsin-EDTA (Gibco, ThermoFisher  
577 Scientific) and 8 mg/ml Collagenase from *Clostridium histolyticum* (Sigma-Aldrich) according to  
578 previously published procedure (Bresciani et al., 2018). Dissociated cells were fixed overnight in 4%  
579 PFA at 4°C, then rinsed thrice in PBS and store at 4°C in PBS, 0.05% sodium azide until analysis. 250000  
580 cells were analyzed on a FACSCanto cytofluorimeter (Becton Dickinson) at each indicated time point  
581 and genotype to evaluate cardiomyocytes ( $GFP^{pos}$ ) representation in whole fish cell suspensions. FACS  
582 profiles were validated using cardiomyocytes enriched cell suspensions prepared from  $GFP^{pos}$  isolated  
583  $Tg(cmlc2:EGFP)$  hearts.

584

### 585 **Phenylhydrazine treatment.**

586 Wild-type zebrafish (about 30 fish per batch) were bathed every other day from 14dpf with 1.25, 2.5  
587 and 5  $\mu\text{g/ml}$  phenylhydrazine in fish water prepared from a freshly made 5 mg/ml stock solution of  
588 phenylhydrazine hydrochloride (Sigma-Aldrich). Non-treated fish served as control. Bathing volume  
589 was gradually increased to accommodate with fish growth (100 to 300 ml). Fish were treated for 30

590 min and then allowed to recover in fresh fish water for about 1 hour and finally replaced into housing  
591 tanks and fed. Fish were subjected to this regimen up to 75dpf before treatment was definitively  
592 stopped to let fish recover and regain gender-specific hallmarks to allow for accurate sex ratio  
593 determination. To assess hypoxia and cardiac stress in fish under phenylhydrazine treatment, 4 batch  
594 of 5 fish of each condition were collected at 29dpf (treatment-free day) and euthanized by excess of  
595 MS222 (320 µg/ml) for total RNA extraction performed as described above. Non-treated wild-type fish  
596 were used as control. Phenylhydrazine treatment of *eng*<sup>-/-</sup> and siblings was performed as for wild-type  
597 (see above) but phenylhydrazine concentrations were downscaled to 0.625, 1.25 and 2.5 µg/ml. Non-  
598 treated Siblings and *eng*<sup>-/-</sup> were used as control. At 29dpf (treatment-free day), each condition was  
599 divided into 4 samples of 4-5 fish/sample and used for total RNA extraction. For phenylhydrazine effect  
600 on *eng*<sup>-/-</sup> survival, siblings and *eng*<sup>-/-</sup> fish were treated as described above using 0.625 and 1.25 mg/ml  
601 phenylhydrazine up to 2 months and were left to recover for 15 days to allow for gender  
602 determination.

603

#### 604 **Histology**

605 Fish were euthanized by excess of MS222 (320 µg/ml) and fixed overnight in 4% PFA. Samples were  
606 decalcified using 0.35 M EDTA. Paraffin embedding was performed by RHEM Histology Facility. Sagittal  
607 sections (7 µm) were dewaxed and stained by hematoxylin-eosin. WISH samples were post-fixed  
608 overnight in 4% PFA. Paraffin embedding was performed by RHEM. Sagittal and transversal sections (7  
609 µm) were dewaxed and counterstained with Nuclear Fast Red.

610

#### 611 **Hemoglobin staining, blood smears and hematocrit measurement.**

612 Hemoglobin content in 3, 5 10 and 15dpf siblings and *eng*<sup>-/-</sup> fish was assessed using o-dianisidine  
613 reagent according to previously published procedure (Leet et al., 2014). Briefly, embryos and larvae  
614 were stained with 0.6 mg/ml o-dianisidine (Alfa Aesar) in 10 mM sodium acetate pH4.5, 0.65% H<sub>2</sub>O<sub>2</sub>  
615 and 40% (v/v) ethanol for 30 min at room temperature. Fish were then wash with PBS and fixed  
616 overnight in 4% PFA. The next day, fish were washed with PBS and soaked for 30 min in 0.8% KOH,  
617 0.9% H<sub>2</sub>O<sub>2</sub> and 0.1% Tween-20 to remove pigments. After washes with PBS, fish were scored for  
618 hemoglobin staining and pictures of representative fish were taken after mounting in 0.7% low-melt  
619 agarose. For blood smears, fish were anaesthetized using MS222 (160µg/ml) and blood samples  
620 obtained from cardiac puncture were smeared on microscope slides. Wright-Giemsa staining was  
621 performed following manufacturer's instructions (Sigma-Aldrich). For hematocrit measurement, wild-  
622 type and *eng*<sup>-/-</sup> adult fish were anaesthetized as described above and blood samples were obtained by  
623 cardiac puncture using 18 µl heparinized capillary tubes (Hirschmann). Samples were processed using  
624 Hematocrit 24 centrifuge (Hettich) and hematocrit was assessed.

625 **Acknowledgements**

626 Authors thank Mireille Rossel, Nicolas Cubedo, Philippe Clair and Stéphane Delbecq for sharing their  
627 expertise.

628

629 **Competing Interest**

630 The authors declare no competing interests

631

632 **Funding**

633 This work was supported by grants to K. Kissa from Association pour la Recherche contre le Cancer  
634 (ARC) ; Chercheur d'Avenir - Région Languedoc-Roussillon ; Fondation pour la Recherche Médicale  
635 (FRM) (FDT20150532507) and ATIP-Avenir.

636

637 **Data availability**

638 The data underlying this article are available in the article and online supplementary material.  
639 Sequence information from endoglin 5' and 3' RACE will be made available upon request.

640

641 **Author contributions**

642 EL. CB. YB. MF. CL. and CJ Performed experiments and/or analyzed data. EL with input from CJ and KK  
643 conceived and designed the study. EL wrote the manuscript.

644 **References**

- 645 **Baeyens, N., Larrivée, B., Ola, R., Hayward-Piatkowskyi, B., Dubrac, A., Huang, B., Ross, T. D., Coon,**  
646 **B. G., Min, E., Tsarfati, M., et al.** (2016). Defective fluid shear stress mechanotransduction  
647 mediates hereditary hemorrhagic telangiectasia. *J. Cell Biol.* 214, 807–816.
- 648 **Bellón, T., Corbí, A., Lastres, P., Calés, C., Cebrián, M., Vera, S., Cheifetz, S., Massague, J., Letarte,**  
649 **M. and Bernabéu, C.** (1993). Identification and expression of two forms of the human  
650 transforming growth factor-beta-binding protein endoglin with distinct cytoplasmic regions.  
651 *Eur. J. Immunol.* 23, 2340–2345.
- 652 **Blanco, F. J. and Bernabeu, C.** (2011). Alternative splicing factor or splicing factor-2 plays a key role in  
653 intron retention of the endoglin gene during endothelial senescence. *Aging Cell* 10, 896–907.
- 654 **Blanco, F. J., Grande, M. T., Langa, C., Oujó, B., Velasco, S., Rodríguez-Barbero, A., Perez-Gomez, E.,**  
655 **Quintanilla, M., López-Novoa, J. M. and Bernabeu, C.** (2008). S-endoglin expression is  
656 induced in senescent endothelial cells and contributes to vascular pathology. *Circ. Res.* 103,  
657 1383–1392.
- 658 **Bourdeau, A., Dumont, D. J. and Letarte, M.** (1999). A murine model of hereditary hemorrhagic  
659 telangiectasia. *J. Clin. Invest.* 104, 1343–1351.
- 660 **Bresciani, E., Broadbridge, E. and Liu, P. P.** (2018). An efficient dissociation protocol for generation  
661 of single cell suspension from zebrafish embryos and larvae. *MethodsX* 5, 1287–1290.
- 662 **Castonguay, R., Werner, E. D., Matthews, R. G., Presman, E., Mulivor, A. W., Solban, N., Sako, D.,**  
663 **Pearsall, R. S., Underwood, K. W., Sehra, J., et al.** (2011). Soluble endoglin specifically binds  
664 bone morphogenetic proteins 9 and 10 via its orphan domain, inhibits blood vessel  
665 formation, and suppresses tumor growth. *J. Biol. Chem.* 286, 30034–30046.
- 666 **Cheifetz, S., Bellón, T., Calés, C., Vera, S., Bernabeu, C., Massagué, J. and Letarte, M.** (1992).  
667 Endoglin is a component of the transforming growth factor-beta receptor system in human  
668 endothelial cells. *J. Biol. Chem.* 267, 19027–19030.
- 669 **Chen, C.-Z., Li, M., de Graaf, D., Monti, S., Göttgens, B., Sanchez, M.-J., Lander, E. S., Golub, T. R.,**  
670 **Green, A. R. and Lodish, H. F.** (2002). Identification of endoglin as a functional marker that  
671 defines long-term repopulating hematopoietic stem cells. *Proc. Natl. Acad. Sci. U.S.A.* 99,  
672 15468–15473.

- 673 **Cho, D., Kim, S., Kim, M., Seo, Y. H., Kim, W., Kang, S. H., Park, S.-M. and Shim, W.** (2012). Two  
674 cases of high output heart failure caused by hereditary hemorrhagic telangiectasia. *Korean*  
675 *Circ J* 42, 861–865.
- 676 **Corti, P., Young, S., Chen, C.-Y., Patrick, M. J., Rochon, E. R., Pekkan, K. and Roman, B. L.** (2011).  
677 Interaction between alk1 and blood flow in the development of arteriovenous  
678 malformations. *Development* 138, 1573–1582.
- 679 **Cottin, V., Dupuis-Girod, S., Lesca, G. and Cordier, J.-F.** (2007). Pulmonary vascular manifestations of  
680 hereditary hemorrhagic telangiectasia (rendu-osler disease). *Respiration* 74, 361–378.
- 681 **Ermini, L., Ausman, J., Melland-Smith, M., Yeganeh, B., Rolfo, A., Litvack, M. L., Todros, T., Letarte,  
682 M., Post, M. and Caniggia, I.** (2017). A Single Sphingomyelin Species Promotes Exosomal  
683 Release of Endoglin into the Maternal Circulation in Preeclampsia. *Sci Rep* 7, 12172.
- 684 **Frétaud, M., Do Khoa, N., Houel, A., Lunazzi, A., Boudinot, P. and Langevin, C.** (2021). New reporter  
685 zebrafish line unveils heterogeneity among lymphatic endothelial cells during development.  
686 *Dev Dyn* 250, 701–716.
- 687 **Gallione, C. J., Richards, J. A., Letteboer, T. G. W., Rushlow, D., Prigoda, N. L., Leedom, T. P.,  
688 Ganguly, A., Castells, A., Ploos van Amstel, J. K., Westermann, C. J. J., et al.** (2006). SMAD4  
689 mutations found in unselected HHT patients. *J. Med. Genet.* 43, 793–797.
- 690 **Goussous, T., Haynes, A., Najarian, K., Daccarett, M. and David, S.** (2009). Hereditary Hemorrhagic  
691 Telangiectasia Presenting as High Output Cardiac Failure during Pregnancy. *Cardiol Res Pract*  
692 2009, 437237.
- 693 **Guttmacher, A. E., Marchuk, D. A. and White, R. I.** (1995). Hereditary hemorrhagic telangiectasia. *N.*  
694 *Engl. J. Med.* 333, 918–924.
- 695 **Hawinkels, L. J. A. C., Kuiper, P., Wiercinska, E., Verspaget, H. W., Liu, Z., Pardali, E., Sier, C. F. M.  
696 and ten Dijke, P.** (2010). Matrix metalloproteinase-14 (MT1-MMP)-mediated endoglin  
697 shedding inhibits tumor angiogenesis. *Cancer Res.* 70, 4141–4150.
- 698 **Hoage, T., Ding, Y. and Xu, X.** (2012). Quantifying cardiac functions in embryonic and adult zebrafish.  
699 *Methods Mol. Biol.* 843, 11–20.
- 700 **Isogai, S., Horiguchi, M. and Weinstein, B. M.** (2001). The vascular anatomy of the developing  
701 zebrafish: an atlas of embryonic and early larval development. *Dev. Biol.* 230, 278–301.



- 702 **Ivan, M. and Kaelin, W. G. (2017).** The EGLN-HIF O<sub>2</sub>-Sensing System: Multiple Inputs and Feedbacks.  
703 *Mol. Cell* 66, 772–779.
- 704 **Jiang, X., Wooderchak-Donahue, W. L., McDonald, J., Ghatpande, P., Baalbaki, M., Sandoval, M.,**  
705 **Hart, D., Clay, H., Coughlin, S., Lagna, G., et al. (2018).** Inactivating mutations in Drosha  
706 mediate vascular abnormalities similar to hereditary hemorrhagic telangiectasia. *Sci Signal*  
707 11,.
- 708 **Jin, Y., Muhl, L., Burmakin, M., Wang, Y., Duchez, A.-C., Betsholtz, C., Arthur, H. M. and Jakobsson,**  
709 **L. (2017).** Endoglin prevents vascular malformation by regulating flow-induced cell migration  
710 and specification through VEGFR2 signalling. *Nat. Cell Biol.* 19, 639–652.
- 711 **Jopling, C., Sleep, E., Raya, M., Martí, M., Raya, A. and Izpisua Belmonte, J. C. (2010).** Zebrafish  
712 heart regeneration occurs by cardiomyocyte dedifferentiation and proliferation. *Nature* 464,  
713 606–609.
- 714 **Jopling, C., Suñé, G., Faucherre, A., Fabregat, C. and Izpisua Belmonte, J. C. (2012).** Hypoxia induces  
715 myocardial regeneration in zebrafish. *Circulation* 126, 3017–3027.
- 716 **Ke, J., Wang, L. and Xiao, D. (2017).** Cardiovascular Adaptation to High-Altitude Hypoxia. *Hypoxia*  
717 *and Human Diseases*.
- 718 **Kilkenny, C., Browne, W. J., Cuthill, I. C., Emerson, M. and Altman, D. G. (2010).** Improving  
719 bioscience research reporting: The ARRIVE guidelines for reporting animal research. *J*  
720 *Pharmacol Pharmacother* 1, 94–99.
- 721 Kimmel, C. B., Ballard, W. W., Kimmel, S. R., Ullmann, B. and Schilling, T. F. (1995). Stages of  
722 embryonic development of the zebrafish. *Dev. Dyn.* 203, 253–310.
- 723 **Kumar, S., Wang, G., Liu, W., Ding, W., Dong, M., Zheng, N., Ye, H. and Liu, J. (2018).** Hypoxia-  
724 Induced Mitogenic Factor Promotes Cardiac Hypertrophy via Calcium-Dependent and  
725 Hypoxia-Inducible Factor-1 $\alpha$  Mechanisms. *Hypertension* 72, 331–342.
- 726 **Laux, D. W., Young, S., Donovan, J. P., Mansfield, C. J., Upton, P. D. and Roman, B. L. (2013).**  
727 Circulating Bmp10 acts through endothelial Alk1 to mediate flow-dependent arterial  
728 quiescence. *Development* 140, 3403–3412.

- 729 **Lee, N. Y. and Blobel, G. C.** (2007). The interaction of endoglin with beta-arrestin2 regulates  
730 transforming growth factor-beta-mediated ERK activation and migration in endothelial cells.  
731 *J. Biol. Chem.* 282, 21507–21517.
- 732 **Lee, N. Y., Ray, B., How, T. and Blobel, G. C.** (2008). Endoglin promotes transforming growth factor  
733 beta-mediated Smad 1/5/8 signaling and inhibits endothelial cell migration through its  
734 association with GIPC. *J. Biol. Chem.* 283, 32527–32533.
- 735 **Leet, J. K., Lindberg, C. D., Bassett, L. A., Isales, G. M., Yozzo, K. L., Raftery, T. D. and Volz, D. C.**  
736 (2014). High-content screening in zebrafish embryos identifies butafenacil as a potent  
737 inducer of anemia. *PLoS One* 9, e104190.
- 738 **Letteboer, T. G. W., Mager, J. J., Snijder, R. J., Koeleman, B. P. C., Lindhout, D., Ploos van Amstel, J.**  
739 **K. and Westermann, C. J. J.** (2006). Genotype-phenotype relationship in hereditary  
740 haemorrhagic telangiectasia. *J. Med. Genet.* 43, 371–377.
- 741 **Li, D. Y., Sorensen, L. K., Brooke, B. S., Urness, L. D., Davis, E. C., Taylor, D. G., Boak, B. B. and**  
742 **Wendel, D. P.** (1999). Defective angiogenesis in mice lacking endoglin. *Science* 284, 1534–  
743 1537.
- 744 **Liao, E. C., Paw, B. H., Peters, L. L., Zapata, A., Pratt, S. J., Do, C. P., Lieschke, G. and Zon, L. I.** (2000).  
745 Hereditary spherocytosis in zebrafish riesling illustrates evolution of erythroid beta-spectrin  
746 structure, and function in red cell morphogenesis and membrane stability. *Development* 127,  
747 5123–5132.
- 748 **Long, P. H.** (1926). Effect of phenylhydrazine derivatives in the treatment of polycythemia. *J Clin*  
749 *Invest* 2, 315–328.
- 750 **Mancini, M. L., Verdi, J. M., Conley, B. A., Nicola, T., Spicer, D. B., Oxburgh, L. H. and Vary, C. P. H.**  
751 (2007). Endoglin is required for myogenic differentiation potential of neural crest stem cells.  
752 *Dev Biol* 308, 520–533.
- 753 **McDonald, J., Bayrak-Toydemir, P. and Pyeritz, R. E.** (2011). Hereditary hemorrhagic telangiectasia:  
754 an overview of diagnosis, management, and pathogenesis. *Genet Med* 13, 607–616.
- 755 **McDonald, J., Wooderchak-Donahue, W., VanSant Webb, C., Whitehead, K., Stevenson, D. A. and**  
756 **Bayrak-Toydemir, P.** (2015). Hereditary hemorrhagic telangiectasia: genetics and molecular  
757 diagnostics in a new era. *Front Genet* 6, 1.

- 758 **Montejo Baranda, M., Perez, M., De Andres, J., De la Hoz, C., Merino, J. and Aguirre, C.** (1984). High  
759 out-put congestive heart failure as first manifestation of Osler-Weber-Rendu disease.  
760 *Angiology* 35, 568–576.
- 761 **Morine, K. J., Qiao, X., Paruchuri, V., Aronovitz, M. J., Mackey, E. E., Buiten, L., Levine, J., Ughreja,**  
762 **K., Nepali, P., Blanton, R. M., et al.** (2017). Conditional knockout of activin like kinase-1 (ALK-  
763 1) leads to heart failure without maladaptive remodeling. *Heart Vessels* 32, 628–636.
- 764 **Muñoz-Sánchez, J. and Chánez-Cárdenas, M. E.** (2019). The use of cobalt chloride as a chemical  
765 hypoxia model. *J Appl Toxicol* 39, 556–570.
- 766 **Ola, R., Dubrac, A., Han, J., Zhang, F., Fang, J. S., Larrivée, B., Lee, M., Urarte, A. A., Kraehling, J. R.,**  
767 **Genet, G., et al.** (2016). PI3 kinase inhibition improves vascular malformations in mouse  
768 models of hereditary haemorrhagic telangiectasia. *Nat Commun* 7, 13650.
- 769 **Ola, R., Künzel, S. H., Zhang, F., Genet, G., Chakraborty, R., Pibouin-Fragner, L., Martin, K., Sessa,**  
770 **W., Dubrac, A. and Eichmann, A.** (2018). SMAD4 Prevents Flow Induced Arteriovenous  
771 Malformations by Inhibiting Casein Kinase 2. *Circulation* 138, 2379–2394.
- 772 **Olson, K. R.** (2002). Vascular anatomy of the fish gill. *J. Exp. Zool.* 293, 214–231.
- 773 **Park, S. O., Lee, Y. J., Seki, T., Hong, K.-H., Fliess, N., Jiang, Z., Park, A., Wu, X., Kaartinen, V.,**  
774 **Roman, B. L., et al.** (2008). ALK5- and TGFBR2-independent role of ALK1 in the pathogenesis  
775 of hereditary hemorrhagic telangiectasia type 2. *Blood* 111, 633–642.
- 776 **Paw, B. H., Davidson, A. J., Zhou, Y., Li, R., Pratt, S. J., Lee, C., Trede, N. S., Brownlie, A., Donovan,**  
777 **A., Liao, E. C., et al.** (2003). Cell-specific mitotic defect and dyserythropoiesis associated with  
778 erythroid band 3 deficiency. *Nat Genet* 34, 59–64.
- 779 **Peyssonnaud, C., Zinkernagel, A. S., Schuepbach, R. A., Rankin, E., Vaulont, S., Haase, V. H., Nizet,**  
780 **V. and Johnson, R. S.** (2007). Regulation of iron homeostasis by the hypoxia-inducible  
781 transcription factors (HIFs). *J. Clin. Invest.* 117, 1926–1932.
- 782 **Pinto, F. L. and Lindblad, P.** (2010). A guide for in-house design of template-switch-based 5' rapid  
783 amplification of cDNA ends systems. *Anal. Biochem.* 397, 227–232.
- 784 **Rochon, E. R., Menon, P. G. and Roman, B. L.** (2016). Alk1 controls arterial endothelial cell migration  
785 in lumenized vessels. *Development* 143, 2593–2602.

- 786 **Roman, B. L., Pham, V. N., Lawson, N. D., Kulik, M., Childs, S., Lekven, A. C., Garrity, D. M., Moon,**  
787 **R. T., Fishman, M. C., Lechleider, R. J., et al.** (2002). Disruption of *acvr1l1* increases  
788 endothelial cell number in zebrafish cranial vessels. *Development* 129, 3009–3019.
- 789 **Rombough, P. and Drader, H.** (2009). Hemoglobin enhances oxygen uptake in larval zebrafish (*Danio*  
790 *rerio*) but only under conditions of extreme hypoxia. *J. Exp. Biol.* 212, 778–784.
- 791 **Shafizadeh, E., Paw, B. H., Foott, H., Liao, E. C., Barut, B. A., Cope, J. J., Zon, L. I. and Lin, S.** (2002).  
792 Characterization of zebrafish merlot/chablis as non-mammalian vertebrate models for severe  
793 congenital anemia due to protein 4.1 deficiency. *Development* 129, 4359–4370.
- 794 **Stockmann, P. T., Will, D. H., Sides, S. D., Brunnert, S. R., Wilner, G. D., Leahy, K. M., Wiegand, R. C.**  
795 **and Needleman, P.** (1988). Reversible induction of right ventricular atriopeptin synthesis in  
796 hypertrophy due to hypoxia. *Circ. Res.* 63, 207–213.
- 797 **Stross, P.** (2013). Woman presenting with chronic iron deficiency anemia associated with hereditary  
798 hemorrhagic telangiectasia: a case report. *Drug Healthc Patient Saf* 5, 203–210.
- 799 **Sugden, W. W., Meissner, R., Aegerter-Wilmsen, T., Tsaryk, R., Leonard, E. V., Bussmann, J., Hamm,**  
800 **M. J., Herzog, W., Jin, Y., Jakobsson, L., et al.** (2017). Endoglin controls blood vessel diameter  
801 through endothelial cell shape changes in response to haemodynamic cues. *Nat. Cell Biol.* 19,  
802 653–665.
- 803 **Sun, X., Hoage, T., Bai, P., Ding, Y., Chen, Z., Zhang, R., Huang, W., Jahangir, A., Paw, B., Li, Y.-G., et**  
804 **al.** (2009). Cardiac hypertrophy involves both myocyte hypertrophy and hyperplasia in  
805 anemic zebrafish. *PLoS ONE* 4, e6596.
- 806 **Thisse, C. and Thisse, B.** (2008). High-resolution in situ hybridization to whole-mount zebrafish  
807 embryos. *Nat Protoc* 3, 59–69.
- 808 **Tian, H., Huang, J. J., Golzio, C., Gao, X., Hector-Greene, M., Katsanis, N. and Blobel, G. C.** (2018).  
809 Endoglin interacts with VEGFR2 to promote angiogenesis. *FASEB J.* 32, 2934–2949.
- 810 **Toporsian, M., Gros, R., Kabir, M. G., Vera, S., Govindaraju, K., Eidelman, D. H., Husain, M. and**  
811 **Letarte, M.** (2005). A role for endoglin in coupling eNOS activity and regulating vascular tone  
812 revealed in hereditary hemorrhagic telangiectasia. *Circ. Res.* 96, 684–692.
- 813 **Tual-Chalot, S., Oh, S. P. and Arthur, H. M.** (2015). Mouse models of hereditary hemorrhagic  
814 telangiectasia: recent advances and future challenges. *Front Genet* 6, 25.

- 815 **Tual-Chalot, S., Garcia-Collado, M., Redgrave, R. E., Singh, E., Davison, B., Park, C., Lin, H., Luli, S.,**  
816 **Jin, Y., Wang, Y., et al.** (2020). Loss of Endothelial Endoglin Promotes High-Output Heart  
817 Failure Through Peripheral Arteriovenous Shunting Driven by VEGF Signaling. *Circ Res* 126,  
818 243–257.
- 819 **van Rooijen, E., Voest, E. E., Logister, I., Korving, J., Schwerte, T., Schulte-Merker, S., Giles, R. H.**  
820 **and van Eeden, F. J.** (2009). Zebrafish mutants in the von Hippel-Lindau tumor suppressor  
821 display a hypoxic response and recapitulate key aspects of Chuvash polycythemia. *Blood* 113,  
822 6449–6460.
- 823 **Venkatesha, S., Toporsian, M., Lam, C., Hanai, J., Mammoto, T., Kim, Y. M., Bdolah, Y., Lim, K.-H.,**  
824 **Yuan, H.-T., Libermann, T. A., et al.** (2006). Soluble endoglin contributes to the pathogenesis  
825 of preeclampsia. *Nat. Med.* 12, 642–649.
- 826 **Wooderchak-Donahue, W. L., McDonald, J., O’Fallon, B., Upton, P. D., Li, W., Roman, B. L., Young,**  
827 **S., Plant, P., Fülöp, G. T., Langa, C., et al.** (2013). BMP9 mutations cause a vascular-anomaly  
828 syndrome with phenotypic overlap with hereditary hemorrhagic telangiectasia. *Am. J. Hum.*  
829 *Genet.* 93, 530–537.
- 830 **Wu, P. R., Horwith, A., Mai, S., Parikh, M., Tyagi, G. and Pai, R. G.** (2017). High-Output Cardiac  
831 Failure Due to Hereditary Hemorrhagic Telangiectasia: A Case of an Extra-Cardiac Left to  
832 Right Shunt. *Int. J. Angiol.* 26, 125–129.
- 833 **Yang, B., Treweek, J. B., Kulkarni, R. P., Deverman, B. E., Chen, C.-K., Lubeck, E., Shah, S., Cai, L. and**  
834 **Gradinaru, V.** (2014). Single-cell phenotyping within transparent intact tissue through whole-  
835 body clearing. *Cell* 158, 945–958.
- 836 **Zeng, X., Zhu, L., Xiao, R., Liu, B., Sun, M., Liu, F., Hao, Q., Lu, Y., Zhang, J., Li, J., et al.** (2017).  
837 Hypoxia-Induced Mitogenic Factor Acts as a Nonclassical Ligand of Calcium-Sensing Receptor,  
838 Therapeutically Exploitable for Intermittent Hypoxia-Induced Pulmonary Hypertension.  
839 *Hypertension* 69, 844–854.

840 **Legends**

841 **Fig. 1 Characterization of zebrafish Endoglin chromosomal organization, transcripts and expression**  
842 **pattern.** (A) Zebrafish *endoglin* gene exon-intron structure on chromosome 5. Coding exons (black),  
843 non-coding exons (grey). (B) RT-PCR analysis of endoglin variants. Endoglin Long (arrowhead) and short  
844 (asterisk) isoform messengers expression in embryo and adult tissue (brain). (C) Protein alignment of  
845 zebrafish Endoglin isoforms. Alternate amino acids (aa) of Endoglin short isoform are in bold.  
846 Transmembrane aa (red). (D) Alignment of Human, mouse and zebrafish Endoglin short isoform.  
847 Identical (black) and similar (grey) aa. (E) RT-PCR analysis of endoglin variants during zebrafish early  
848 development. Endoglin short (asterisk), Endoglin Long (arrowhead) isoform. (F) Whole-mount in situ  
849 hybridization using dig-labelled endoglin antisense riboprobe on 24hpf wild-type embryo. Inset, close-  
850 up of trunk region showing endoglin differential expression between dorsal aorta (DA) and posterior  
851 cardinal vein (PCV). Intersegmental vessels (arrowheads). Right panel, Close-up of head region showing  
852 mostly venous endoglin expression, ACeV, Anterior cerebral vein; MCEV, Middle cerebral vein; PHBC,  
853 Primordial hindbrain channel; PMBC, Primordial midbrain channel; OV, optic vein

854  
855 **Fig. 2 Endoglin deficiency results in congestive heart failure in zebrafish.** (A) Sanger sequencing  
856 chromatograms of gRNA targeted region on endoglin exon 2 in wild-type (*eng*<sup>+/+</sup>), heterozygous (*eng*<sup>+/-</sup>)  
857 and homozygous (*eng*<sup>-/-</sup>) mutants. Complementary gRNA sequence is indicated below chromatograms.  
858 (B) Imaging of 72hpf *eng*<sup>-/-</sup> and siblings blood flow pattern. Analysis performed in *Tg(kdrl:GFP)*,  
859 *Tg(gata1:mRFP)* background to highlight blood vessels and erythrocytes respectively. Pictures shown  
860 are representative of data from siblings (n=10) and *eng*<sup>-/-</sup> (n=8). Bar, 500 μm. (C) Kaplan-Meier  
861 representation of *eng*<sup>+/+</sup>, *eng*<sup>+/-</sup> and *eng*<sup>-/-</sup> survival. +/+ vs -/- and +/- vs -/- *P*<0.0001, +/+ vs +/- ns, not  
862 significant in Log-rank (Mantel-Cox) Test. +/+ n=45, +/- n=104, -/- n=56. Arrows point to symptomatic  
863 siblings later identified as *eng*<sup>+/-</sup>. (D) Influence of genotype over sex ratio in 3 months plus individuals.  
864 Data from two complete independent experiments plus two focused on *eng*<sup>-/-</sup>. Total number of  
865 individuals analyzed is indicated above bars. (E) Representative morphology of 30dpf *eng*<sup>-/-</sup> and  
866 siblings. Note the enlarged cardiac area and overall paleness in *eng*<sup>-/-</sup> fish. Bar, 1 mm. (F) Hematoxyllin-  
867 eosin staining of heart histological sections reveals dramatic enlargement and structural alteration of  
868 the ventricle, hypochromic red blood cells and swollen surrounding tissue. Bar, 100 μm. (a, atrium;  
869 ba, bulbus arteriosus; v, ventricule)

870  
871 **Fig. 3. Cardiac stress, ventricle enlargement and cardiomyocyte proliferation correlate with hypoxia**  
872 **in Endoglin deficient fish.** (A) Kinetic RT-qPCR analysis of *nppa* and *nppb* (cardiac stress), (B) *egln3*,  
873 *epoa* (hypoxia), in 5, 10, 15, 20, 25 and 30 dpf sibling and *eng*<sup>-/-</sup> (genotyping is presented below graphs).  
874 Gene of interest expression values were normalized to *rpl13a*. 5dpf=15 fish, 10dpf=15 fish, 15dpf=8

875 fish, 20dpf=5fish, 25dpf=4 fish, 30dpf=3 fish. Data are mean  $\pm$  sem of technical replicates. Statistical  
876 analysis one-tailed Mann-Whitney test (*nppa* 15dpf  $P=0.05$ , 20dpf  $P=0.05$ , 25dpf  $P=0.05$ , 30dpf  
877  $P=0.05$ ) (*nppb* 15dpf  $P=0.05$ , 20dpf  $P=0.0383$ , 25dpf  $P=0.05$ , 30dpf  $P=0.05$ ), (*egln3* 15dpf  $P=0.05$ , 20dpf  
878  $P=0.05$ , 25dpf  $P=0.03831$ , 30dpf  $P=0.05$ ), (*epoa* 15dpf  $P=0.05$ , 20dpf  $P=0.05$ , 25dpf  $P=0.05$ , 30dpf  
879  $P=0.05$ ). (C) Analysis of ventricle volume in 10, 12 and 15dpf siblings and *eng*<sup>-/-</sup> in *Tg(cmlc2:GFP)*  
880 background. Statistical analysis: one-tailed Mann-Whitney test, (\*)  $P=0.0159$ . (D) Representative Flow  
881 cytometry analysis of cardiomyocytes (*cmlc2:GFP*<sup>pos</sup>) fraction in whole organism cell suspension from  
882 5, 10, 15, 20 ad 25dpf fish. Cell suspensions at 5, 10, 15, 20 and 25dpf were prepared from pool of 26,  
883 18, 9, 7 and 7 sibling or *eng*<sup>-/-</sup>, respectively. Bottom graph represents fold change in *cmlc2:GFP*<sup>pos</sup> cells  
884 in *eng*<sup>-/-</sup> relative to siblings

885

886 **Fig. 4. Abnormal branchial vascular development in Endoglin deficient fish underlies structural**  
887 **impairment of gills.** (A) Representative histological sections of 30dpf sibling and *eng*<sup>-/-</sup> gills stained with  
888 hematoxylin-eosin. Note the poorly developed and organized lamellae (arrowhead) and dramatically  
889 enlarged artery (asterisk) on branchial arch 4 (AA6) in *eng*<sup>-/-</sup> fish gills. Bar, 100  $\mu$ m. (B) Kinetic analysis  
890 of gill vascular development in 10, 12 and 15dpf sibling and *eng*<sup>-/-</sup> in *Tg(kdrl:GFP,flt1:tdtomato)*  
891 background. Note the reduced length of afferent filamental artery (*GFP*<sup>pos</sup>, *dtTomato*<sup>High</sup>) and efferent  
892 filamental artery (*GFP*<sup>pos</sup>, *dtTomato*<sup>low/neg</sup>) (arrowheads) and enlarged efferent branchial artery)  
893 (asterisk) as early as 10dpf. Note the overall loss of Flt-1 reporter signal in 15dpf *eng*<sup>-/-</sup>. Bar, 100  $\mu$ m  
894

895 **Fig. 5. Phenylhydrazine treatment alleviates pathological conditions induced by Endoglin deficiency**  
896 **in zebrafish.** (A) RT-qPCR analysis of *egln3*, *epoa* and *nppa* and *nppb* expression in 30dpf siblings (sib)  
897 versus *eng*<sup>-/-</sup> fish untreated (ctrl) or treated with 0.625, 1.25 and 2.5 $\mu$ g/ml phenylhydrazine (phz).  
898 Target gene expression is represented as  $2^{-\Delta CT}$  using *rpl13a* as reference. Samples are pools of 5 fish.  
899 Data are presented as individual sample values and mean  $\pm$  sem. Statistical analysis one-tailed Mann-  
900 Whitney test: *egln3*: sib ctrl vs -/- ctrl  $P=0.0143$ , -/- ctrl vs -/- phz0.625  $P=0.0143$ , -/- ctrl vs -/- phz1.25  
901  $P=0.0143$ , -/- ctrl vs -/- phz2.5  $P=0.0143$ ; *epoa*: sib ctrl vs -/- ctrl  $P=0.0143$ , -/- ctrl vs -/- phz0.625  $P=$   
902  $0.0143$ , -/- ctrl vs -/- phz1.25  $P=0.0143$ ; *nppa*: sib ctrl vs -/- ctrl  $P=0.0143$ , -/- ctrl vs -/- phz0.625  $P=$   
903  $0.0143$ , -/- ctrl vs -/- phz1.25  $P=0.0143$ , -/- ctrl vs -/- phz2.5  $P=0.0143$ ; *nppb*: sib ctrl vs -/- ctrl  $P=$   
904  $0.0143$ , -/- ctrl vs -/- phz0.625  $P=0.0143$ , -/- ctrl vs -/- phz1.25  $P=0.0143$ , -/- ctrl vs -/- phz2.5  $P=0.0143$ .  
905 (B) Phenylhydrazine treatment enhances *eng*<sup>-/-</sup> survival. Kaplan-Meier representation of the survival  
906 of siblings and *eng*<sup>-/-</sup> non-treated (ctrl) or treated with phenylhydrazine at 0.625 or 1.25  $\mu$ g/ml. siblings  
907 vs -/- ctrl or -/-phz1.25 or -/-phz0.625  $P<0.0001$ , -/- vs -/- phz1.25  $P=0.0039$ , and -/- vs -/-phz0.625  
908  $P=0.0009$  Log-rank (Mantel-Cox) Test. siblings  $n=66$ , -/-  $n=55$ , -/-phz1.25  $n=53$  and -/-phz0.625  $n=48$ .  
909 (C) Influence of Phenylhydrazine treatment over sex ratio in 2.5 months plus individuals. Numbers

910 above bars indicate the numbers of surviving fish analyzed. Percent of males and females are indicated  
911 inside bars. Of note, fish of undefined gender have been excluded from calculations.



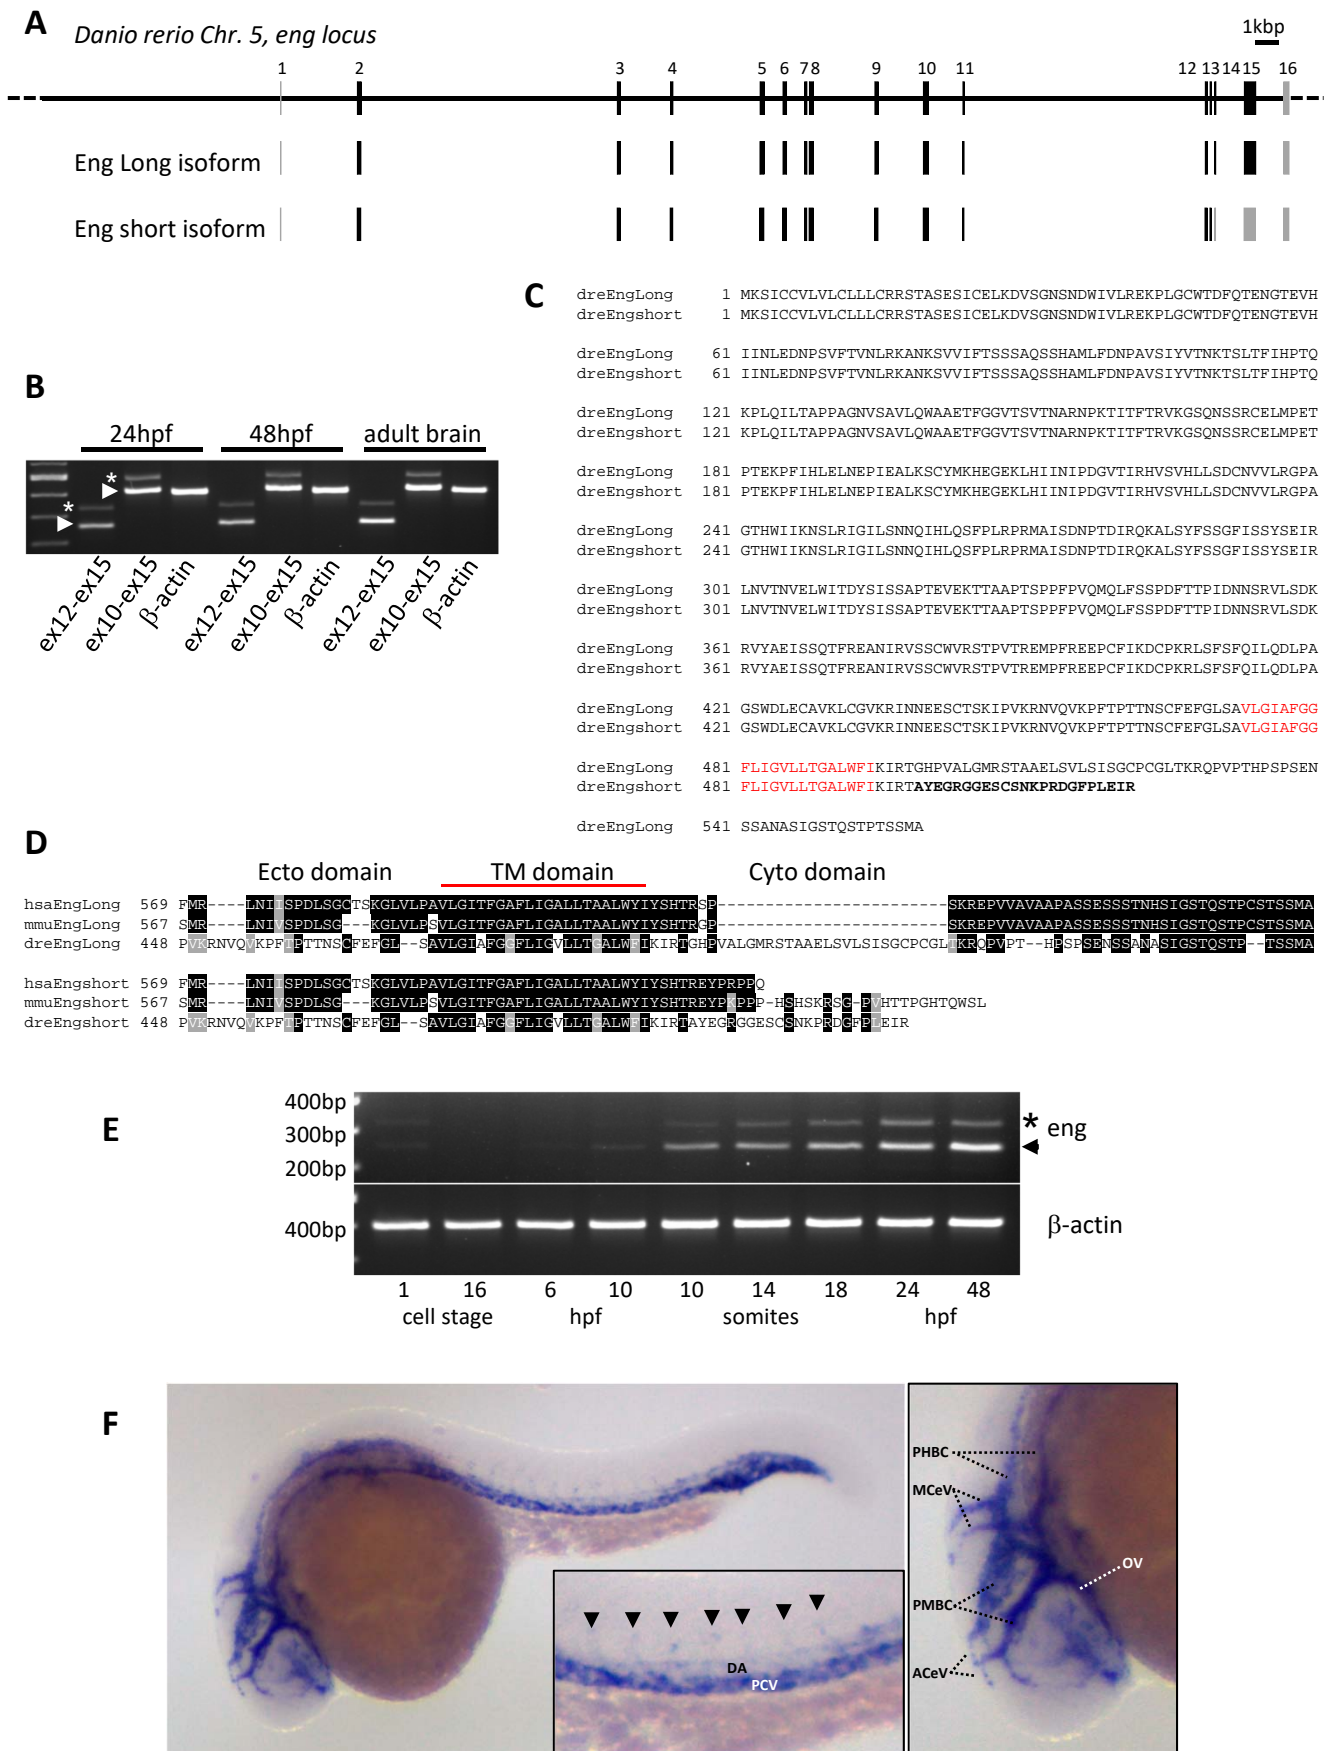

Fig. 1

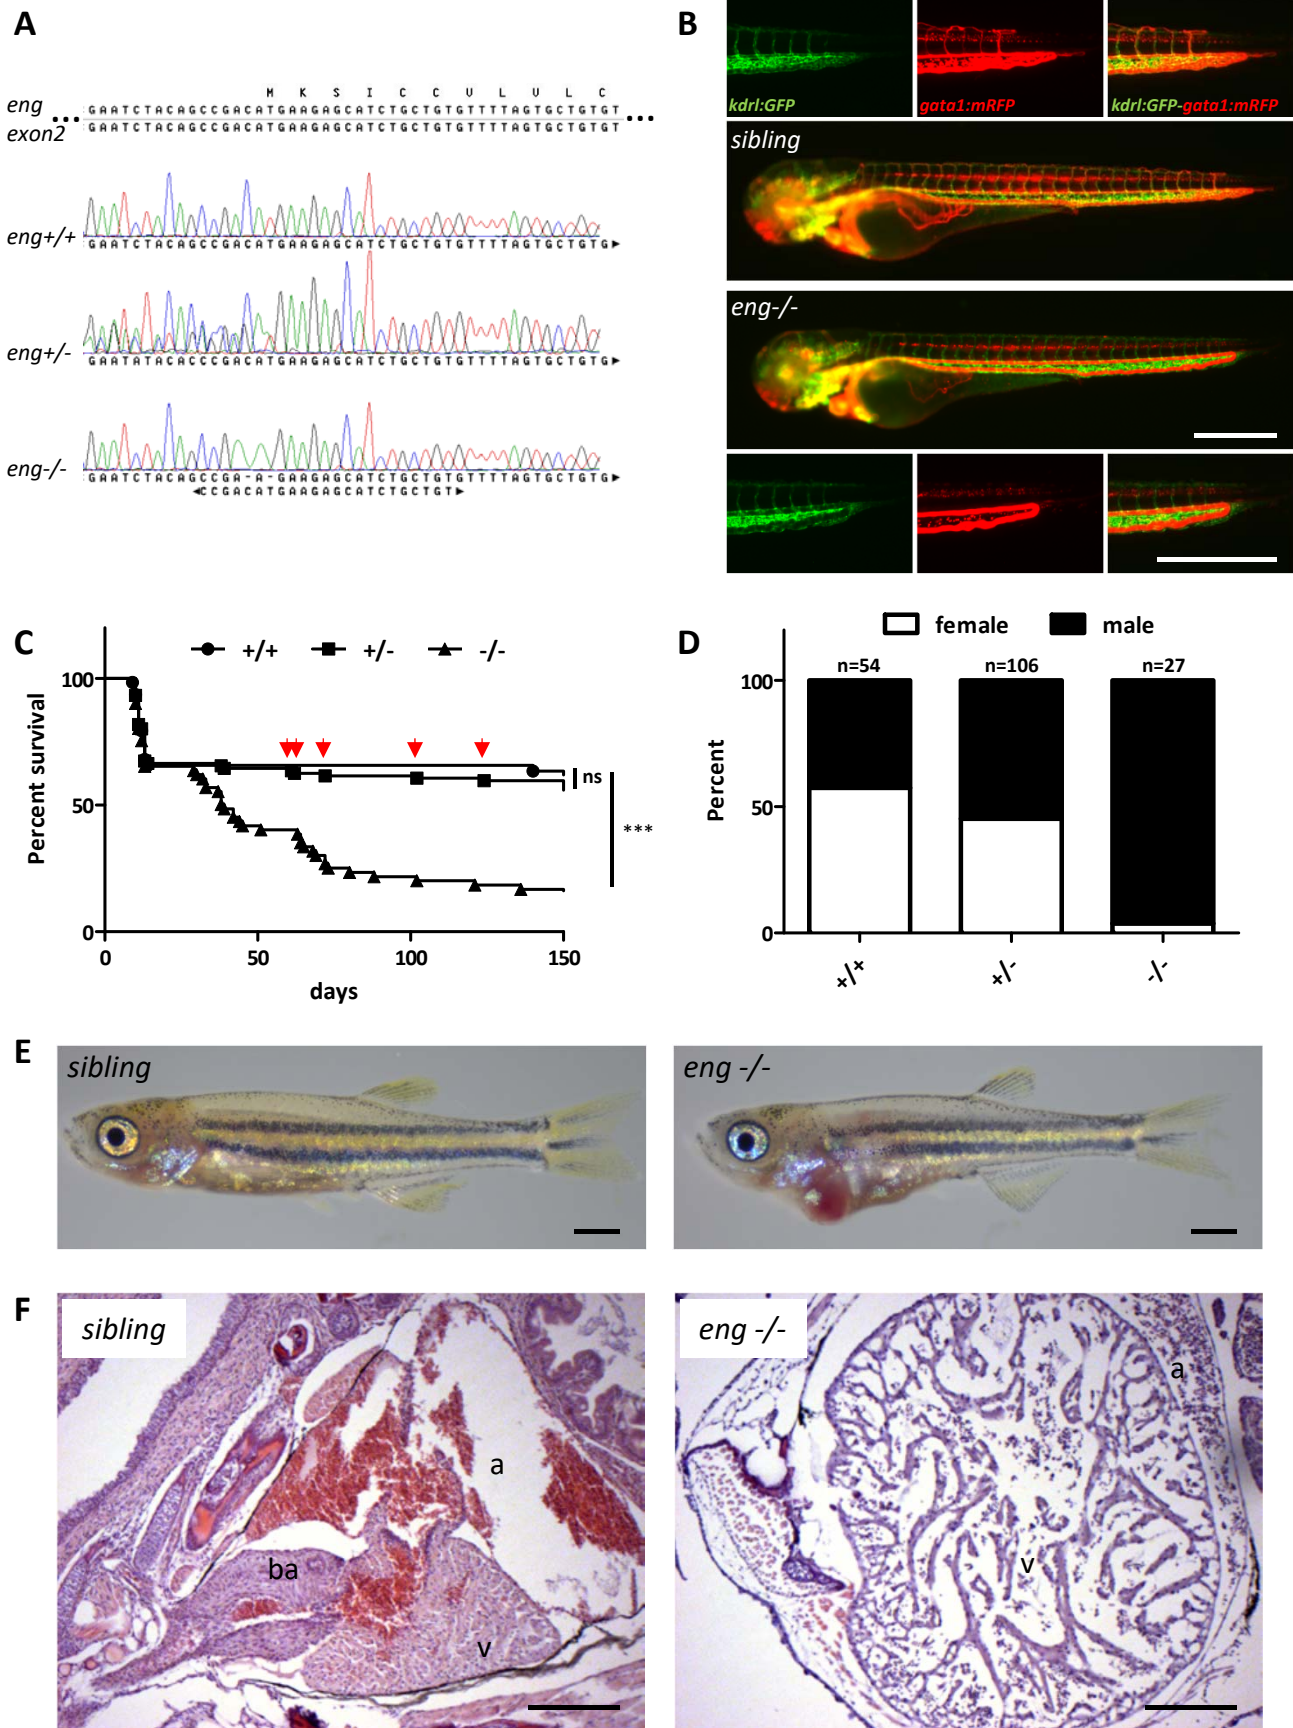

Fig. 2

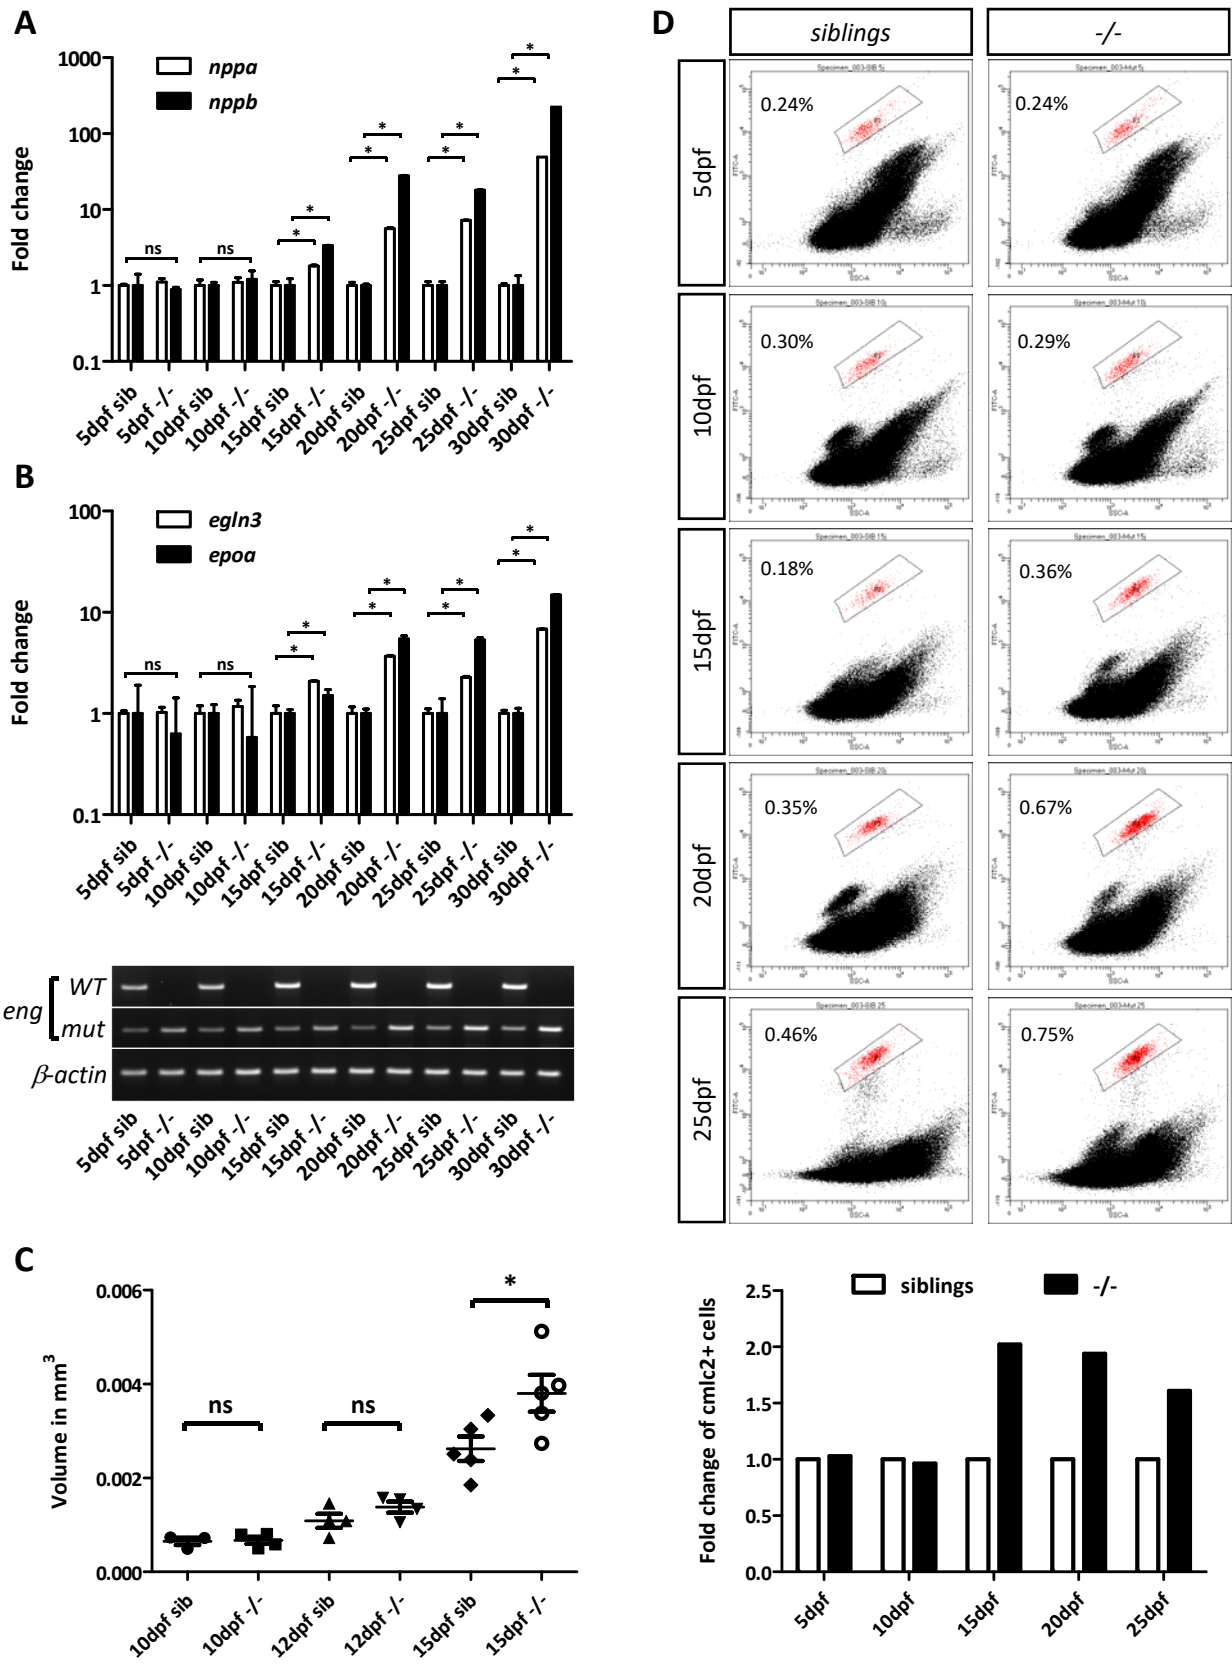

Fig. 3

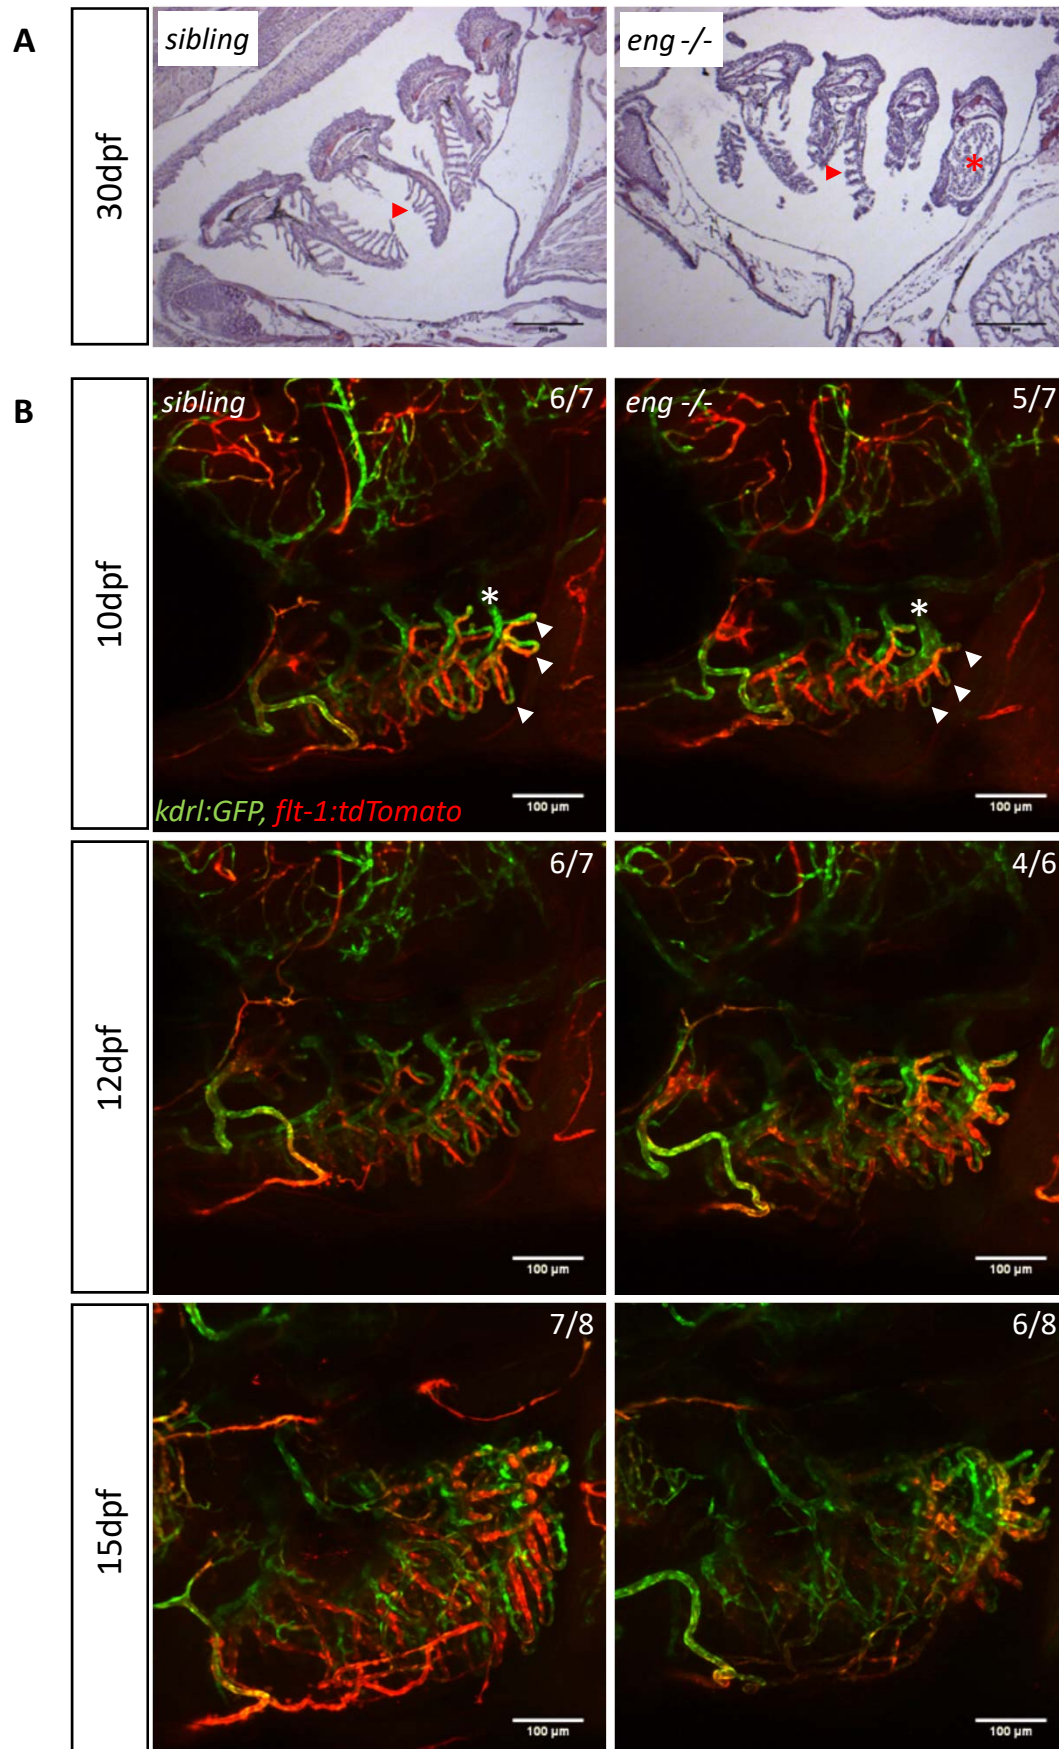

Fig. 4

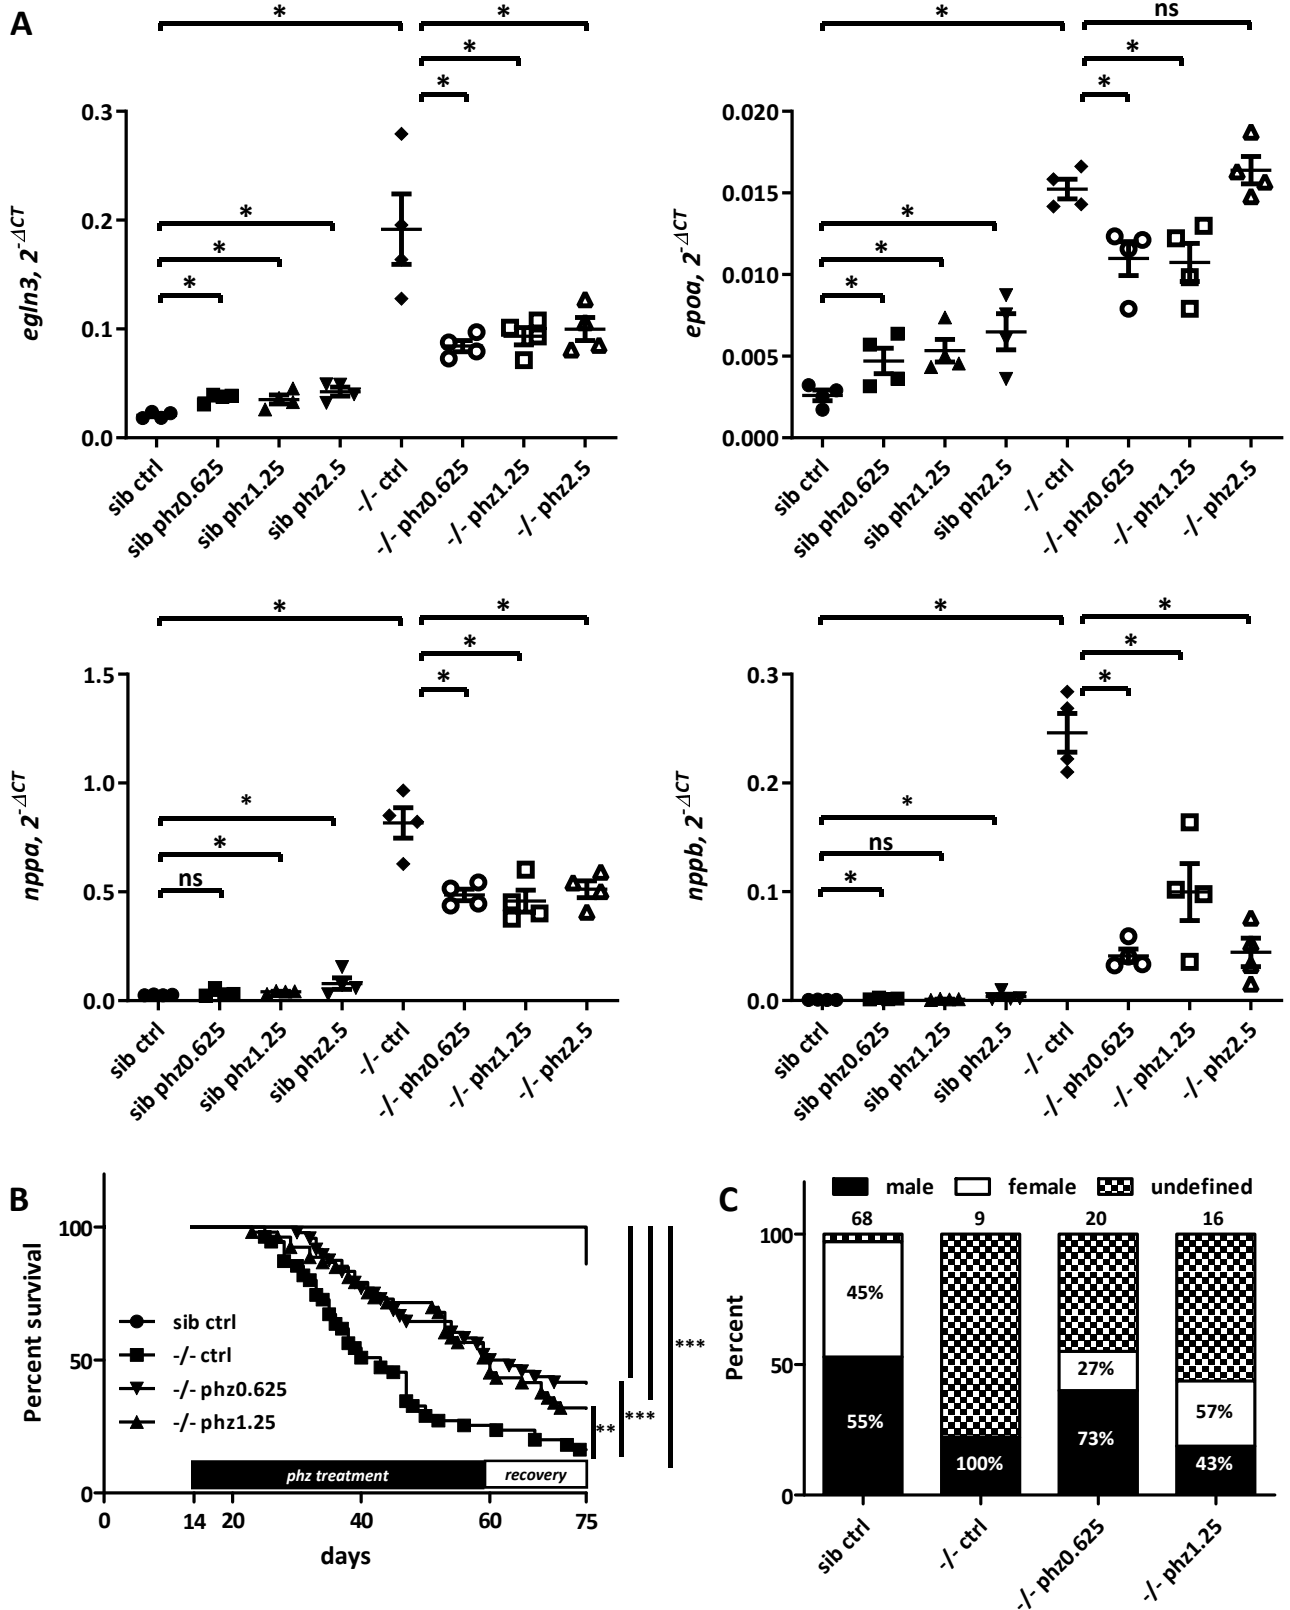

Fig. 5
