# Supplementary material for: Endoglin deficiency elicits hypoxia-driven congestive heart failure in zebrafish
Source: bioRxiv or medRxiv preprint supplement (doi:10.1101/2021.10.09.463775), 2022-01-27
Supplement: Supplementary file [file media-1.pdf]

1 **Legends to supplementary figures**

2 **Supplementary Fig. S1. Decreased amounts of endoglin transcripts in *eng*<sup>-/-</sup> suggest nonsense mRNA**  
3 **decay of mutant transcripts.** Quantitative RT-PCR analysis of all-endoglin (A), wild-type endoglin (B)  
4 and mutant endoglin (C) mRNA expression in 72hpf wild-type (WT), siblings (sib) and *eng*<sup>-/-</sup> (-/-)  
5 embryos. Target gene expression is represented as 2<sup>-ΔCT</sup> using rpl13a as reference. Samples (5 for each  
6 genotype) are pools of 17 to 23 embryos. nd, not detected. Statistical analysis: one-tailed unpaired *t*-  
7 test; WT vs sib *P*=0.0984, WT vs -/- *P*=0.0012, sib vs -/- *P*=0.0093.

8

9 **Supplementary Fig. S2. Overall appearance of 3-month-old adult size *eng*<sup>+/+</sup>, asymptomatic and**  
10 **symptomatic *eng*<sup>+/-</sup> and *eng*<sup>-/-</sup> fish.** Note the overall reddish color of symptomatic fish and dilated  
11 blood vessels at the root of caudal, pectoral and anal fins. Arrow points to enlarged cardiac area.  
12 Pictures were taken from alive fish directly in their housing tanks therefore fish size is not  
13 representative

14

15 **Supplementary Fig. S3. Phenotypic details of symptomatic *eng*<sup>+/-</sup>.** Representative lateral (left panels)  
16 and ventral (right panels) pictures of adult (6 months) *eng*<sup>+/+</sup>, asymptomatic and symptomatic *eng*<sup>+/-</sup>  
17 and *eng*<sup>-/-</sup> (females) showing the presence of dilated blood vessels reminiscent of telangiectasias. Note  
18 the cardiomegaly in *eng*<sup>-/-</sup> and characteristic hydropsy symptoms such as bulging eyes and pinecone-  
19 like scales, sign of multiple organ failure only observed secondary to heart failure. Bar, 1mm

20

21 **Supplementary Fig. S4. Anemia is not responsible for hypoxia in Endoglin deficient larvae.**  
22 Hemoglobin assessment in siblings versus *eng*<sup>-/-</sup> does not reveal early anemia in *eng*<sup>-/-</sup>. Representative  
23 Whole-mount o-dianisidine staining of 3, 5, 10 and 15dpf *eng*<sup>-/-</sup> and siblings. Numbers in upper right  
24 corner of pictures indicate the number of fish with similar pattern out of total number analyzed. Bar,  
25 500μm

26

27 **Supplementary Fig. S5. Endoglin expression in developing gills.** (A) Whole-mount in situ hybridization  
28 using Endoglin antisense riboprobe on 10, 12 and 15dpf wild-type zebrafish larvae. Upper panels,  
29 lateral views; lower panels, ventral views. Bar, 100μm. Asterisk indicate heart location. (B)  
30 Representative histological sections of WISH using endoglin antisense probe in 15dpf zebrafish larvae  
31 showing endoglin expression in developing gills. Sagittal section (left) transversal section (right)  
32 (b,brain; ea-lda, epibranchial arteries-lateral dorsal aorta; g, gills k, kidney; l, liver, va, ventral aorta).  
33 Bar, 100μm

34

35 **Supplementary Fig. S6. Phenylhydrazine-induced hypoxia fails to mimic Endoglin deficiency heart**  
36 **failure condition.** (A) Representative pictures of one-month-old wild-type fish non-treated (ctrl) or  
37 treated with 5  $\mu\text{g}/\text{ml}$  phenylhydrazine (phz). Note the overt paleness of gills area (asterisk) and slightly  
38 enlarged heart region (arrowhead). Bar, 1mm. (B) RT-qPCR analysis of *egln3*, *epoa* (hypoxia responsive  
39 gene) and *nppa* and *nppb* (cardiac stress responsive gene) expression in one-month-old wild-type fish  
40 non-treated (ctrl) or treated with 1.25, 2.5 and 5 $\mu\text{g}/\text{ml}$  phenylhydrazine. Target gene expression is  
41 represented as  $2^{-\Delta\text{CT}}$  using *rpl13a* as reference. Samples (4 for each condition) are pools of 5 fish. Data  
42 are presented as individual sample values and mean  $\pm$  sem. Statistical analysis: one-tailed Mann-  
43 Whitney test; *egln3* ctrl vs phz1.25 and phz2.5  $P=0.0097$ , ctrl vs phz5  $P=0.0060$ , phz1.25 vs phz2.5  
44  $P=0.0143$ , phz1.25 vs ph5  $P=0.0079$ ; *epoa* ctrl vs phz1.25  $P=0.0286$ , ctrl vs phz2.5 and phz5  $P=0.0143$ ,  
45 phz1.25 vs phz2.5 and ph5  $P=0.0143$ ; *nppa* ctrl vs phz2.5 and phz5  $P=0.0143$ , phz1.25 vs ph5  $P=0.0143$ ;  
46 *nppb* ctrl vs phz2.5 and phz5  $P=0.0143$ , phz1.25 vs ph5  $P=0.0143$ . ns  $P>0.05$ . (C) Analysis of  
47 phenylhydrazine treatment effect over fish survival. Kaplan-Meier representation of the survival of  
48 non-treated (ctrl) and 1.25, 2.5 and 5  $\mu\text{g}/\text{ml}$  phz treated wild-type fish. Note the dose dependent effect  
49 of phz concentration over survival but absence of deleterious effect at early juvenile stage. ctrl vs  
50 phz1.25  $P=0.0114$ , ctrl vs phz2.5  $P=0.0051$ , ctrl vs phz5  $P<0.0001$ , phz1.25 vs phz5  $P=0.0113$ , phz2.5 vs  
51 phz5  $P=0.0310$  and phz1.25 vs phz2.5  $P=0.71219$  (ns) Log-rank (Mantel-Cox) Test. (D) Analysis of phz  
52 treatment influence over sex ratio in 3-month-old individuals. Note the absence of gender bias at any  
53 phenylhydrazine concentration.

54

55 **Supplementary Fig. S7. Hematological features of *eng*<sup>-/-</sup> fish.** (A) Representative pictures of  
56 hematoxylin-eosin stained histological sections from siblings versus *eng*<sup>-/-</sup> fish at 30dpf. Note kidney  
57 hypercellularity indicative of reactive erythropoiesis. Bar, 100 $\mu\text{m}$ . (B) Representative pictures of  
58 Wright-Giemsa stained blood smears from sibling versus *eng*<sup>-/-</sup> fish at 25 and 30dpf. Note the marked  
59 difference of erythrocyte shape and staining between siblings and *eng*<sup>-/-</sup>. Bar, 20 $\mu\text{m}$ . (C) Adult (6 month  
60 or older) *eng*<sup>-/-</sup> exhibit increased hematocrit compared to wild-type fish. Mean hematocrit of wild-type  
61 ( $n=13$ )  $41.96 \pm 1.798\%$  vs *eng*<sup>-/-</sup> ( $n=13$ )  $50.75 \pm 1.746\%$ . Statistical analysis: one-tailed unpaired *t*-test;  
62  $P=0.0009$ .

63

64 **Supplementary Fig. S8. Intestinal hemorrhages in adult *eng*<sup>-/-</sup> fish.** (A) Wright-Giemsa stained smear  
65 of collected clot from hemorrhage in 5 month old fish. The smear (only part of it) is shown as an  
66 indication of blood loss extent. Bar, 100 $\mu\text{m}$ . (B) Fresh clot from intestinal hemorrhage from 2-month-  
67 old *eng*<sup>-/-</sup> fish. Bar, 1mm. Inset, close-up picture. Of note, the size of the sample indicative of massive  
68 blood loss. Clot rapidly turns pale since erythrocytes tends to release their content once exposed to  
69 tank water. Fish died 4 days after hemorrhagic episode.

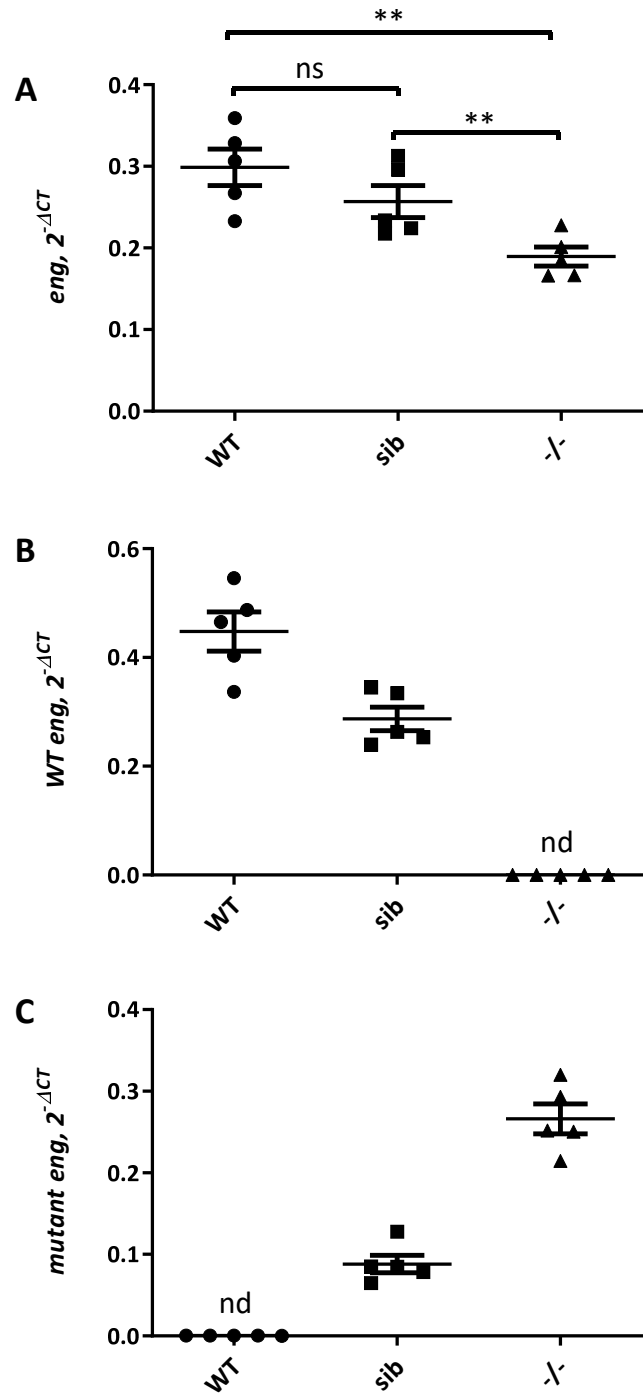

Fig. S1

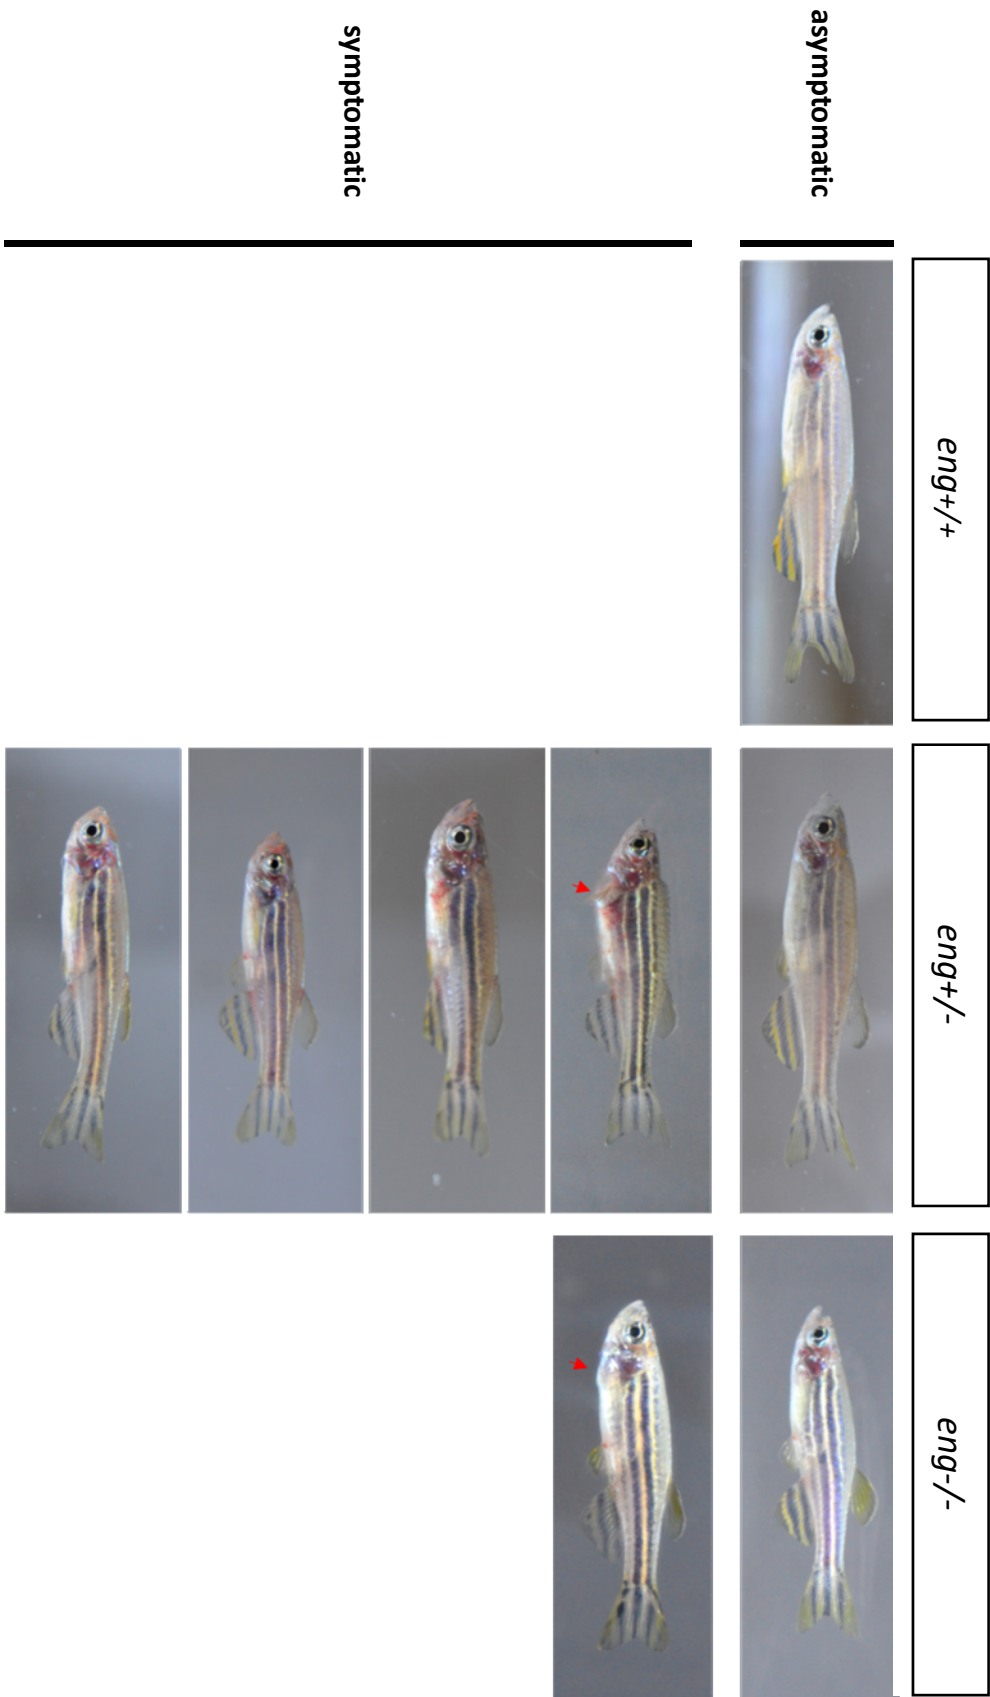

Fig. S2

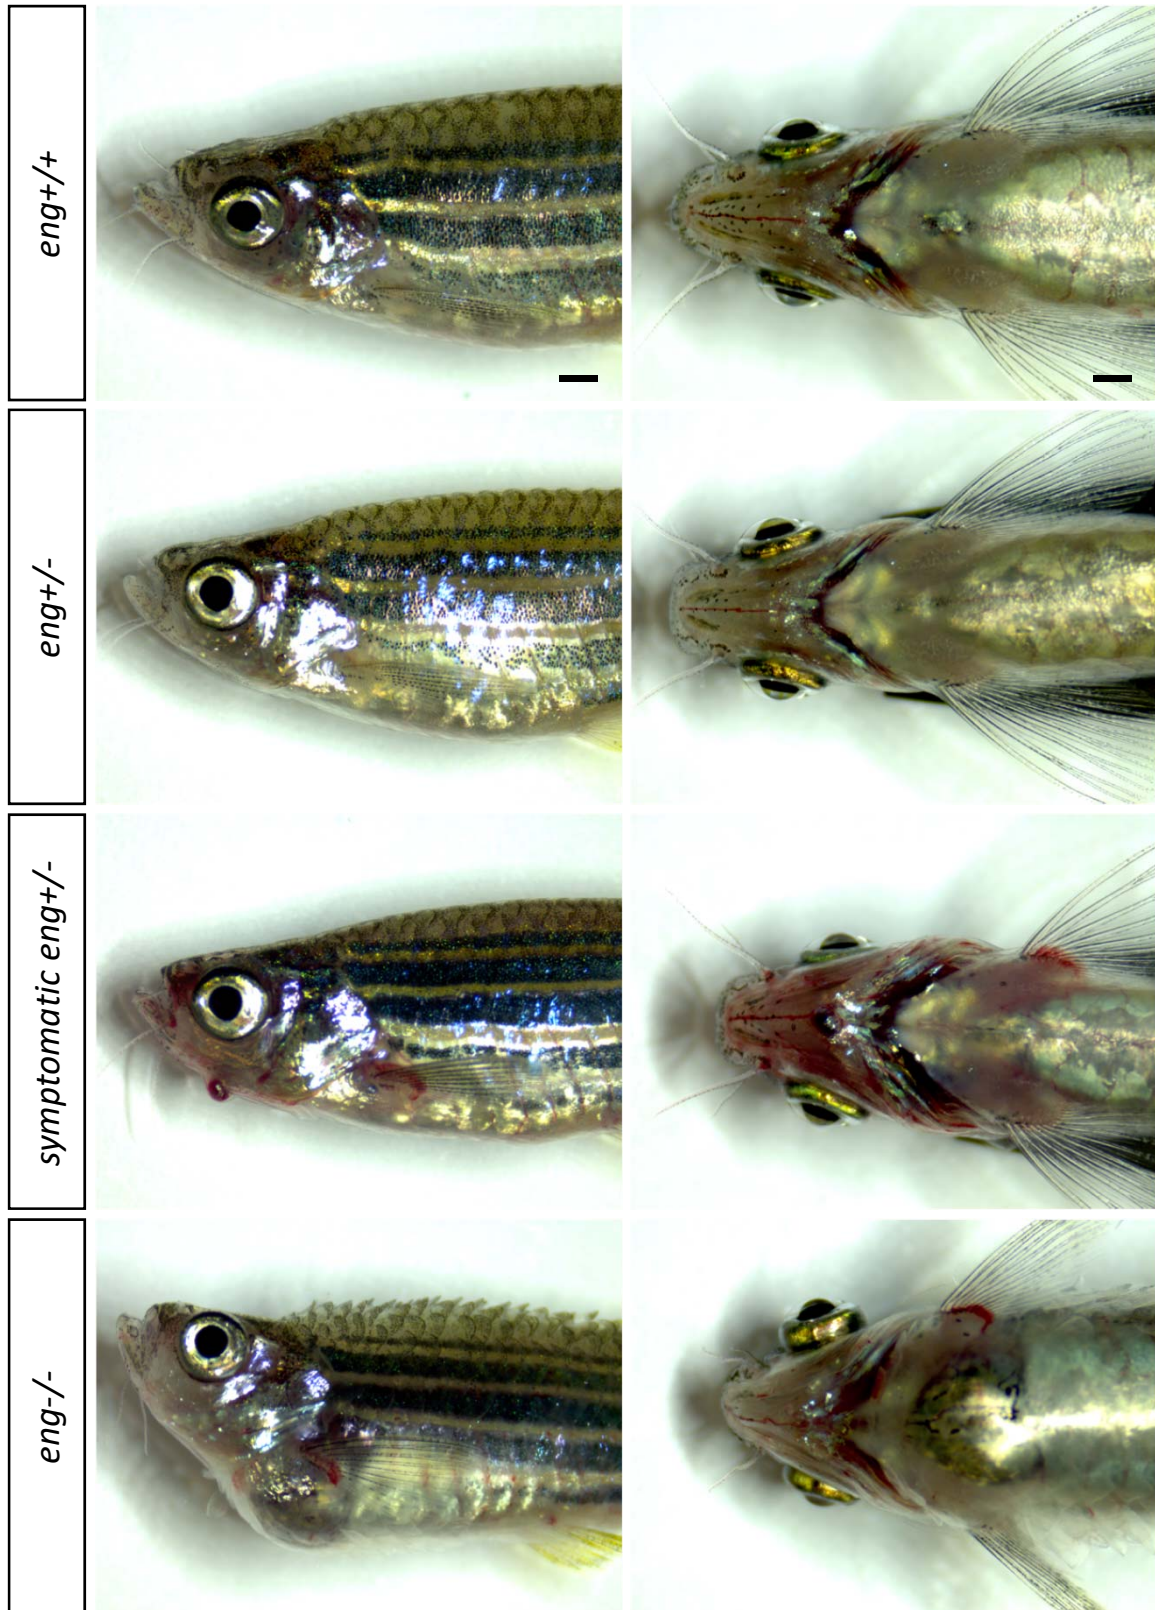

Fig. S3

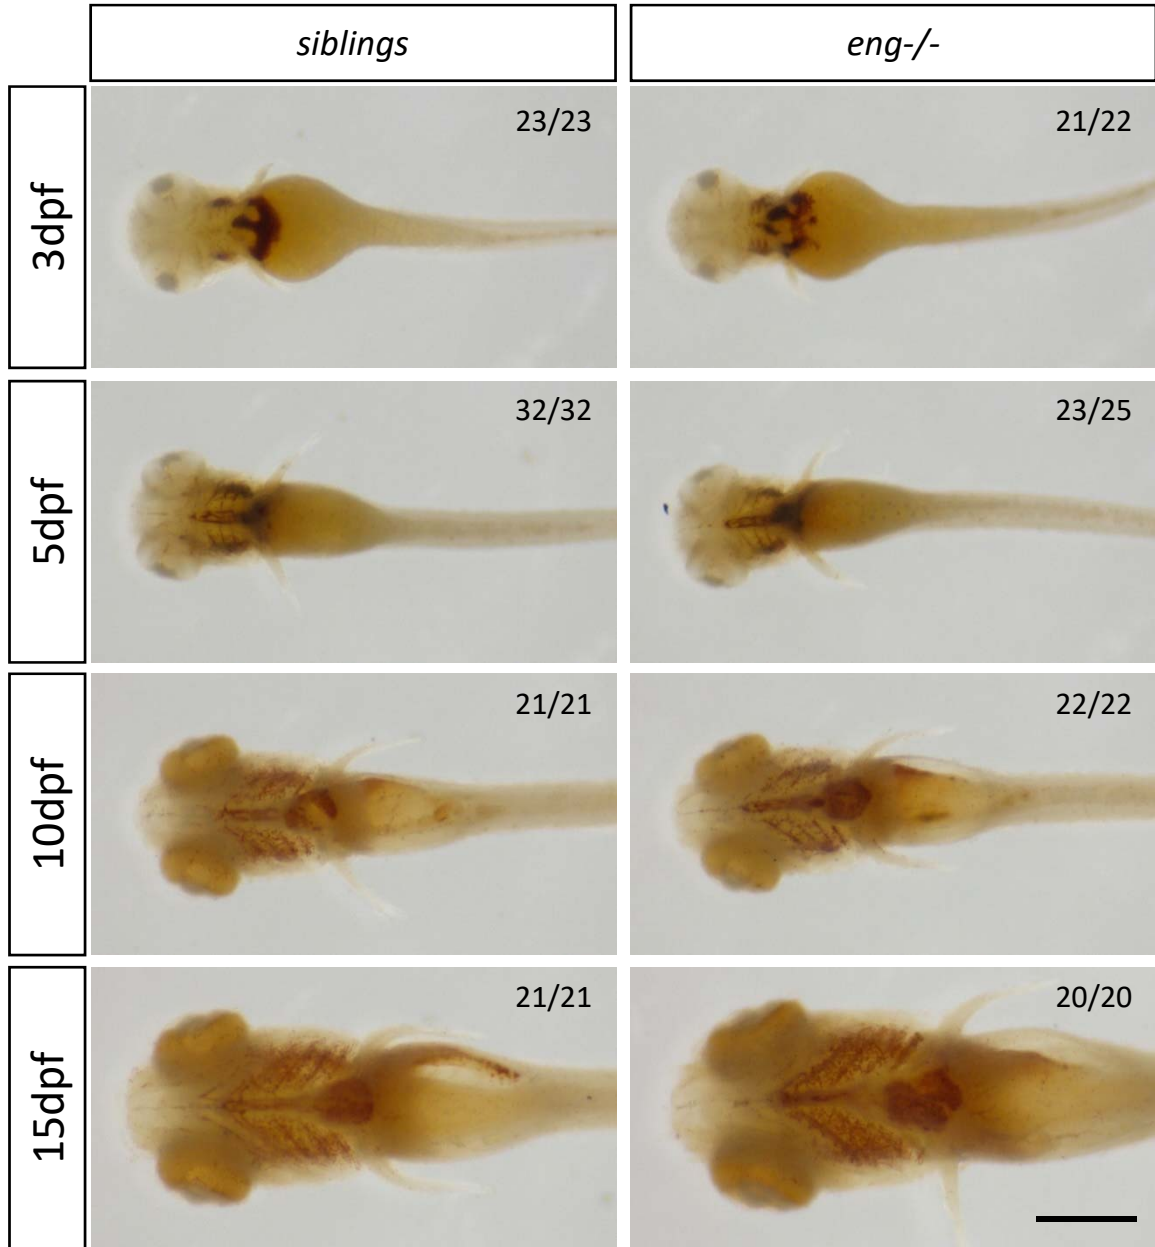

Fig. S4

**A**

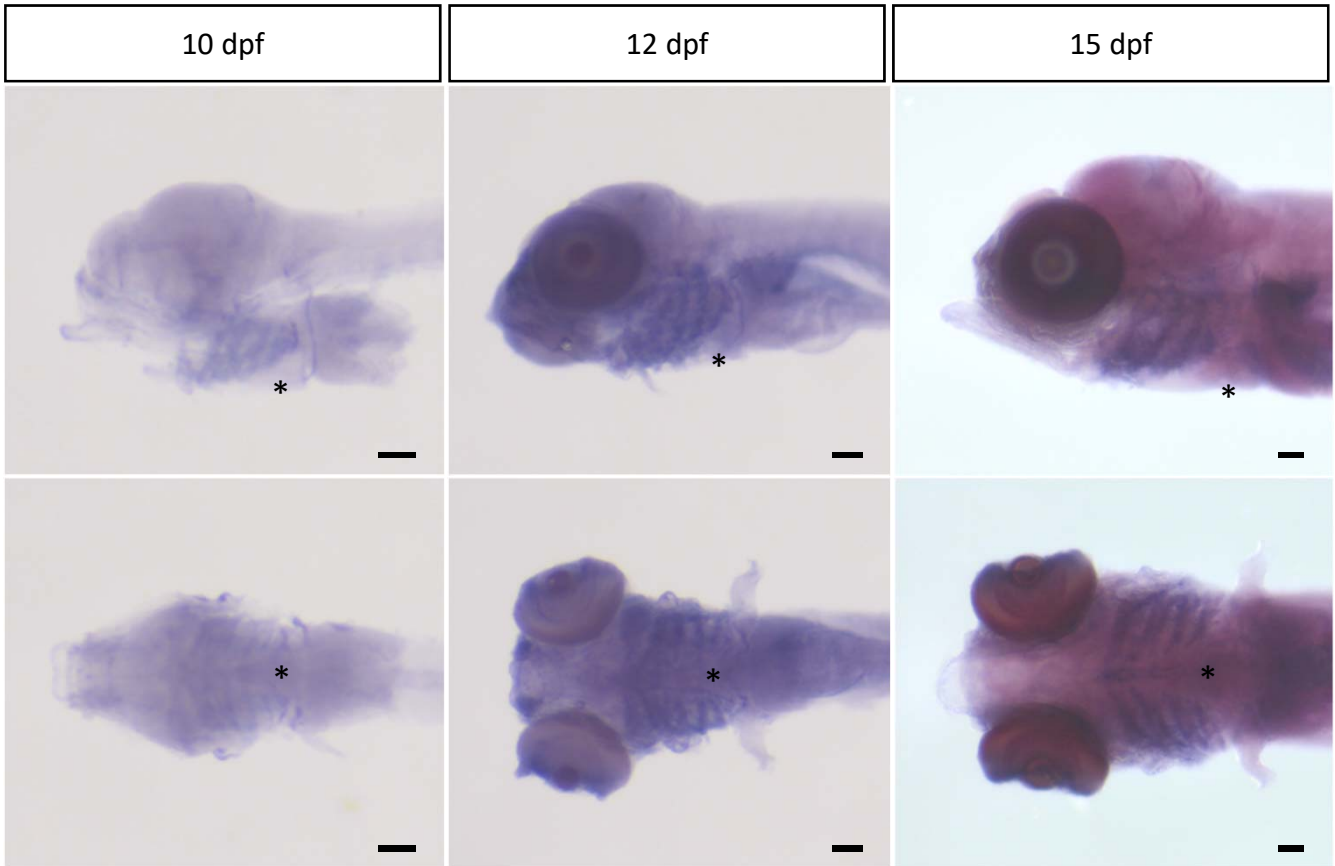

**B**

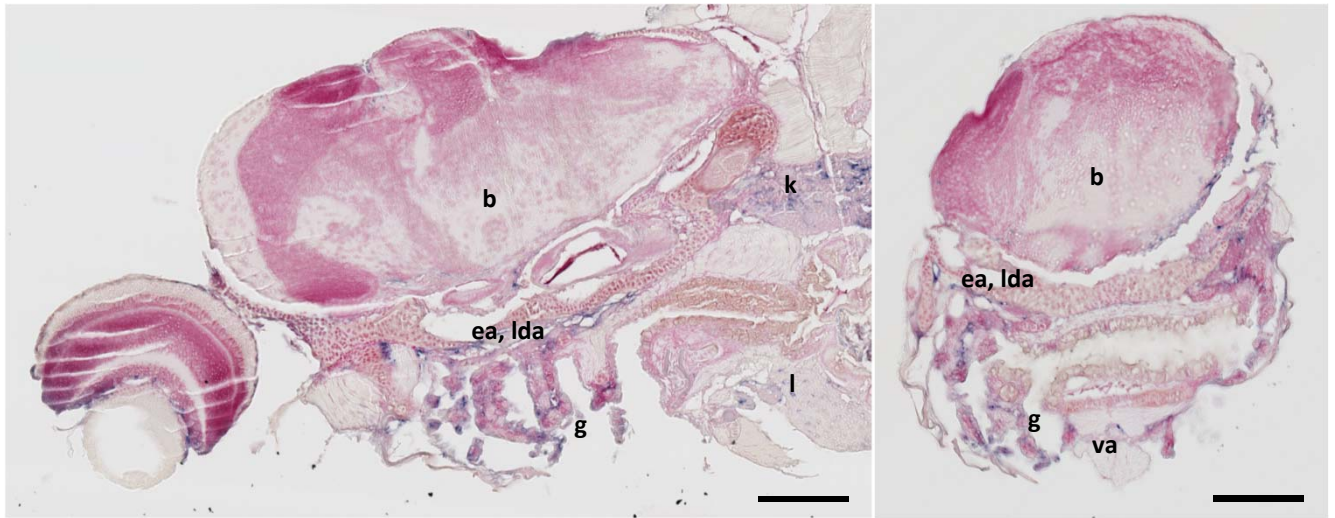

Fig. S5

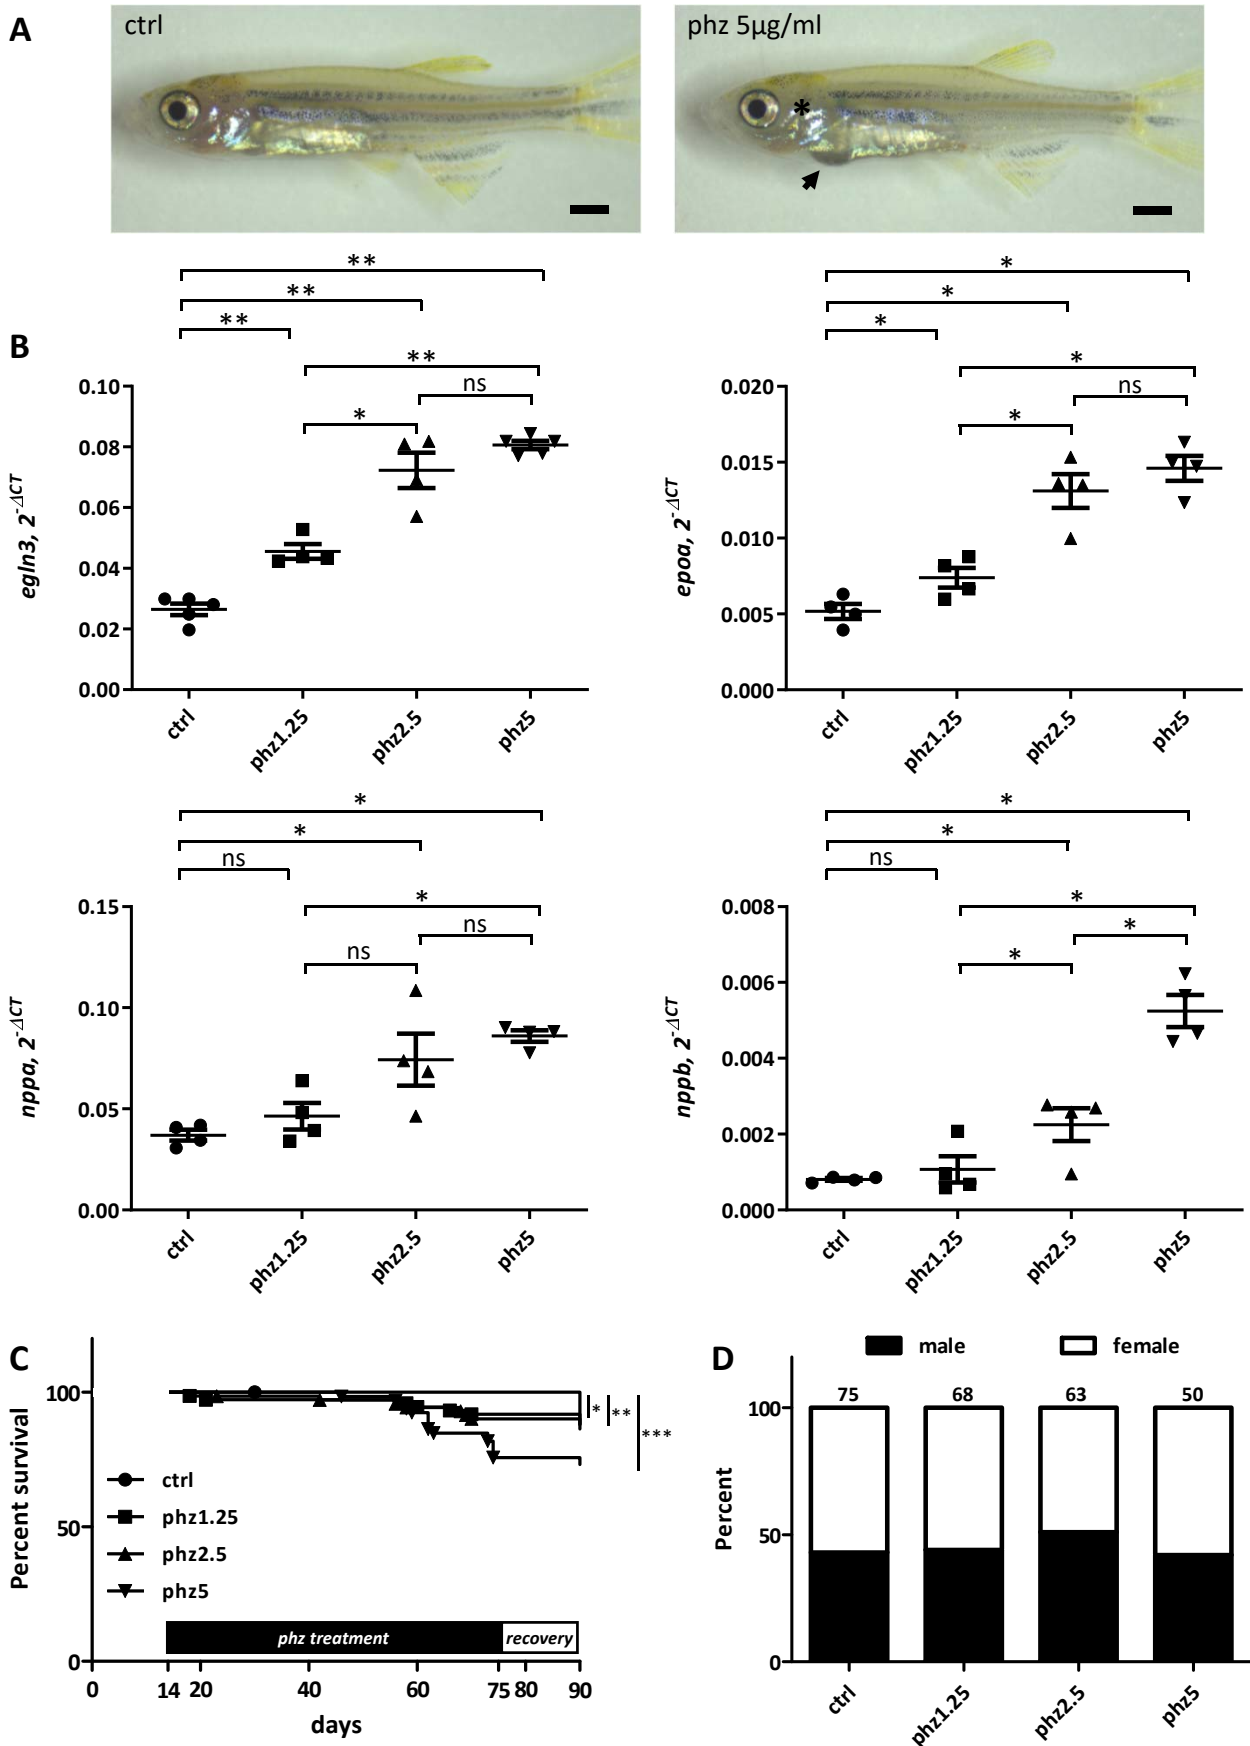

Fig. S6



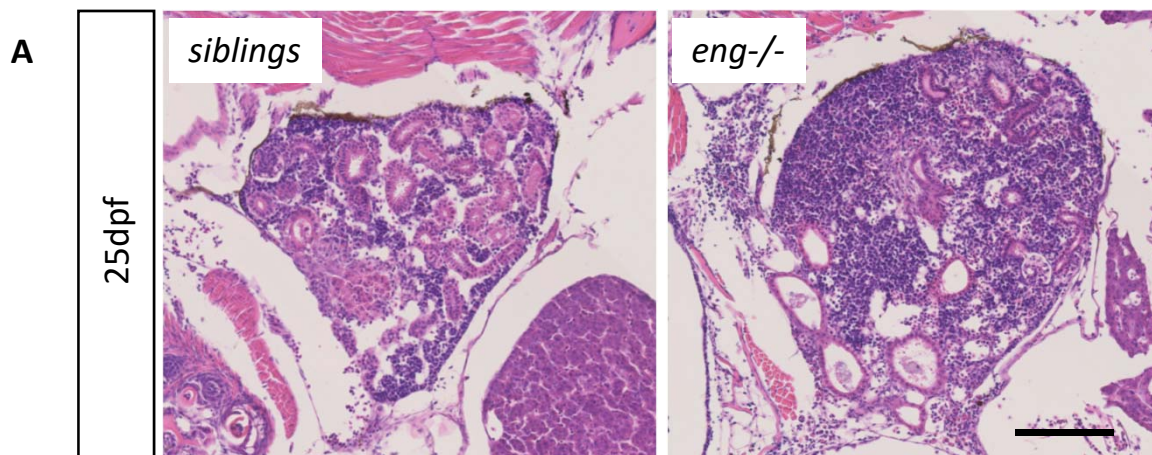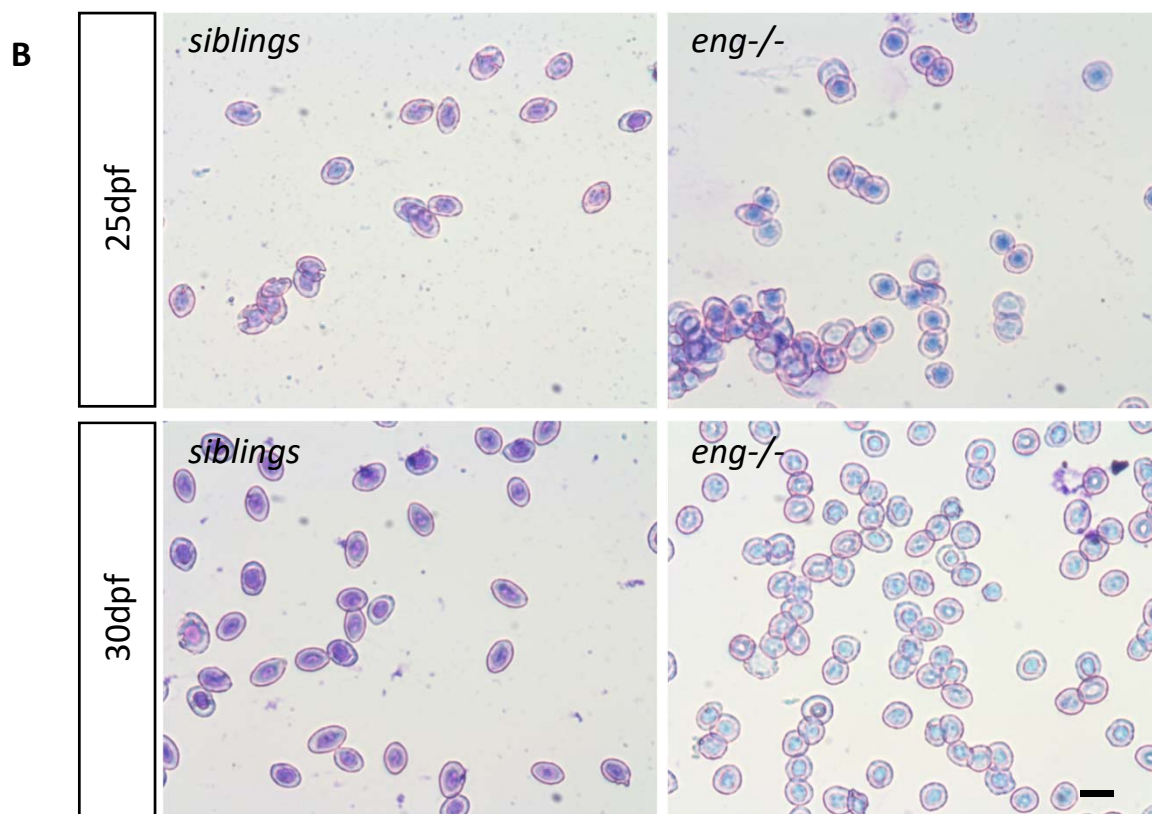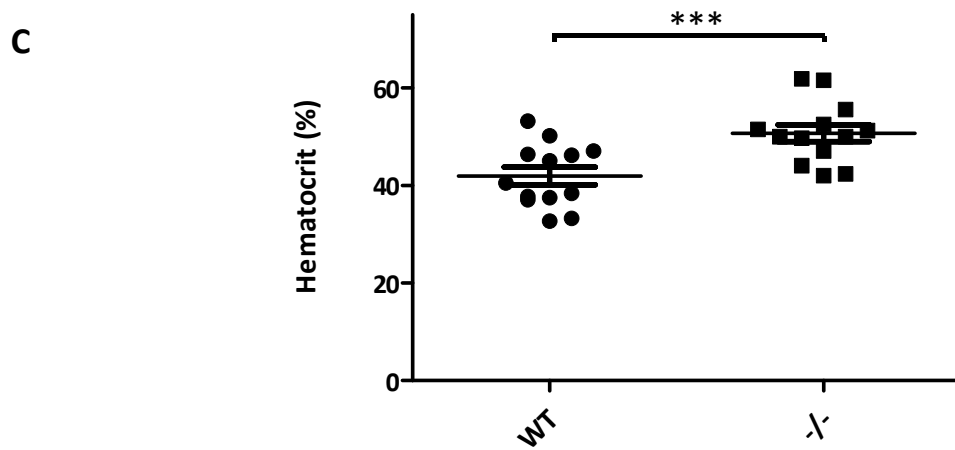

Fig. S7

**A**

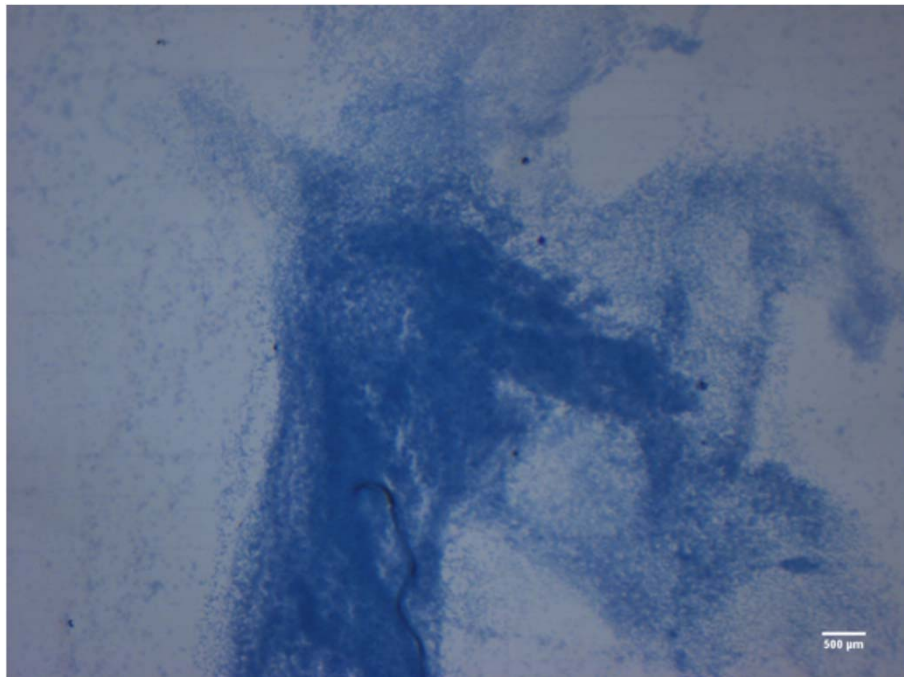

**B**

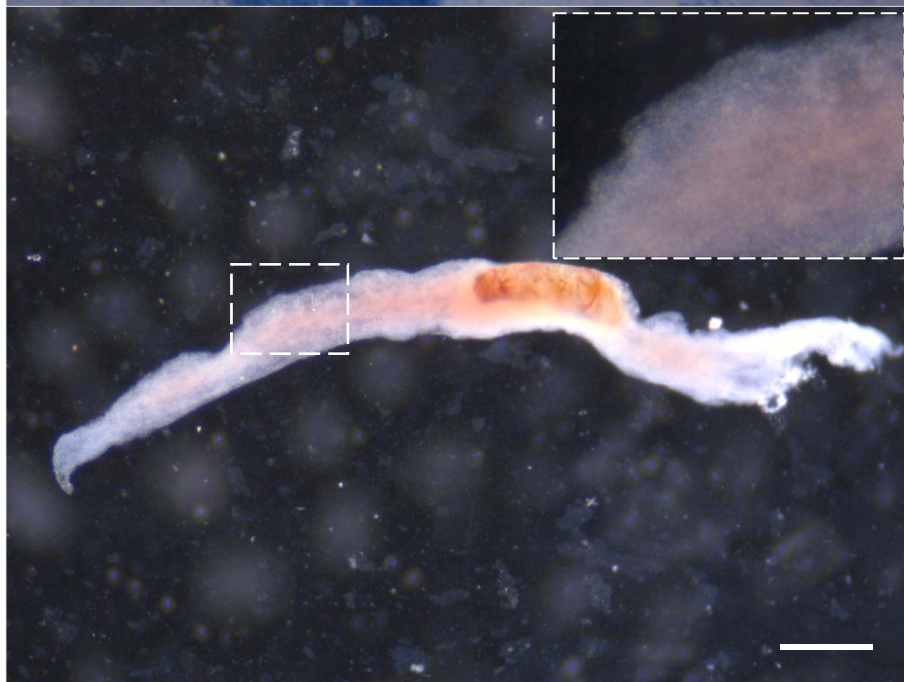

Fig. S8
